# Supplementary material for: Impact of sensitive circulating tumor DNA monitoring on CT scan intervals during postoperative colorectal cancer surveillance
Source: bioRxiv or medRxiv preprint supplement (doi:10.1101/2022.09.03.22279571), 2023-10-25
Supplement: Supplementary file [file media-1.pdf]

## Supplementary Methods

### Identifying somatic mutations in primary tumor tissue

Sequencing analysis of the primary tumor was performed using three different platforms for each set of patients with colorectal cancer (CRC). Tumor samples from 11, 27, and 14 patients were analyzed for Sets 1, 2, and 3, respectively. In Set 1, three regions of the primary tumor and corresponding DNA from peripheral blood mononuclear cells (PBMCs) (four samples) were analyzed to assess the effect of intra-tumor genetic heterogeneity on circulating tumor DNA (ctDNA) in our previous study (Ref. 33 of the main text). That study revealed that tumor genetic heterogeneity did not appear to represent a major obstacle for ctDNA analysis provided that a somatic mutation having a sufficient variant allele frequency (VAF) was selected from a single region of the tumor. Furthermore, commonly detected mutations among the three tumor regions were limited to several genes, such as *TP53*, *APC*, *KRAS*, *PIK3CA*, *FBXW7*, and *BRAF*.

To reduce costs and improve mutation detection efficiency of tumor sequencing, the pairing between tumor and PBMC-DNA (two DNA samples) was analyzed for Set 2 samples using a customized panel targeting 39 genes specific for CRC using an Ion Proton™ system (Thermo Fisher Scientific, Waltham, MA). Amplicon sequencing followed by identification of somatic mutations using the Ion Reporter software 5.0 tumor-normal workflow (Thermo Fisher Scientific) was performed as previously described (Refs. 32 and 34 of the main text). The following criteria were used as cutoffs: (1) total coverage >200, (2) variant coverage >10, and (3) variant frequency >10%. Mutations were subsequently called if they occurred in <0.1% of the reads in the normal control (minor allele frequency) and were absent from the dbSNP and 1000 Genomes Project database.

Considering the high mutation detection efficiency of tumor sequencing using the customized panel for Set 2, we analyzed only tumor DNA samples from a single region for Set 3 using an Ion S5™ system (Thermo Fisher Scientific). In Set 3, alignment to reference genomes and sequencing read counting were performed with Torrent Suite version 5.0 (Thermo Fisher Scientific), Hisat2 (<https://ccb.jhu.edu/software/hisat2/index.shtml>), and BWA (Burrows–Wheeler Alignment tool). In such cases, commonly-detected mutations among the three algorithms were prioritized in the subsequent mutation selection. The following criteria were used as cutoffs: (1) total coverage >200, (2) variant coverage >10, and (3) variant frequency >10%. Mutations were selected as with Set 2. Furthermore, mutations were called if they also occurred with minor allele frequencies (MAF < 0.01) in the Japanese SNP database

of the Tohoku Medical Megabank Organization (ToMMo).<sup>1</sup> Moreover, the same mutations shared among more than 3 of 14 patients in Set 3 were excluded from mutation selection when they did not frequently occur in CRC given the high likelihood that they resulted from sequence errors. For insertion and deletion mutations, the following criteria were used as cutoffs: (1) total coverage > 200; (2) variant coverage > 10; and (3) variant frequency > 20%. For Set 3, the dPCR probe/premier set for each specific mutation was designed after confirming that Sanger sequencing detected the mutation in tumor DNA and but not PBMC DNA.

### **Criteria for mutation selection in ctDNA assay using digital PCR**

According to our previous studies, between 1 and 5 mutations having VAFs >10% that were found in primary tumors were prioritized for digital PCR (dPCR) analysis (References 32-35 of the main text). The criteria used to select mutations for ctDNA assay were: (1) the mutation having the highest VAF in the primary tumor; (2) up to four additional mutations having a VAF >10% in the primary tumors; (3) recurrent mutations observed among patients; (4) mutated genes having a high success rate for primer/probe validation; and (5) exclusion of mutations with a surrounding sequence suspected of having low PCR efficiency and low specificity of hybridized probes (e.g., self-complementarity and/or secondary structure of the primer/probe). Furthermore, those mutations that were already validated in the tumor DNA from CRC or other types of malignancies could reduce the temporary cost and time needed for syntheses of specifically-designed probes for each tumor-specific mutation. Therefore, mutations listed in our dPCR primer/probe library and commercially available primer/probe sets (Quantdetect, Inc, Tokyo, Japan) were analyzed, even if the mutations detected in the primary tumors did not satisfy the criteria for mutation selection.

### **Definitions of ctDNA positivity and negativity in dPCR assays**

As previously described (References 32-35 of the main text), dPCR was performed using the QuantStudio3D Digital PCR system (Thermo Fisher Scientific). After PCR amplification, chips were read on a QuantStudio 3D Digital PCR Instrument (Thermo Fisher Scientific), and a secondary analysis was performed using QuantStudio 3D Analysis Suit Cloud software (Thermo Fisher Scientific). For further quality control, the boundaries of FAM, VIC, and undetermined events were manually defined. After confirmation of sufficiently separate reactions of both wild-type and mutant alleles in tumor DNA, plasma DNA was evaluated by dPCR. Plasma samples having more than two positive reactions (i.e., dots) for mutant DNA were defined as ctDNA-positive. If

only one positive reaction for mutant DNA was detected, samples were considered to be ctDNA-positive when more than one positive reaction for mutant DNA could be repeatedly detected upon retesting of the same sample. The VAF values were calculated as the fraction of mutant/(mutant + wild) divided by the number of partitions in which either the mutant or wild-type sequence was detected.<sup>2</sup> If no mutant partitions were detected, the case DNA was regarded as “negative”.

### References

1. Okuda H, Okamoto K, Abe M, et al. Correction to: Genome-wide association study identifies new loci for albuminuria in the Japanese population. *Clin Exp Nephrol* 2021;25:565.
2. Huggett JF, Foy CA, Benes V, et al. The digital MIQE guidelines: Minimum Information for publication of Quantitative digital PCR Experiments. *Clin Chem* 2013;59:892-902.

**Supplementary Table 1. Clinicopathological characteristics of patients in the study cohort.**

| Patient No. | Age range | Sex    | Primary tumor location | Size (mm <sup>2</sup> ) | UICC stage <sup>a</sup> |       |    |    |                     | Preoperative metastatic organ |
|-------------|-----------|--------|------------------------|-------------------------|-------------------------|-------|----|----|---------------------|-------------------------------|
|             |           |        |                        |                         | T                       | depth | N  | M  | pStage <sup>b</sup> |                               |
| CC16001     | 71-75     | Female | Cecum                  | 47×60                   | 4a                      | SE    | 1a | 0  | IIIB                | -                             |
| CC16002     | 81-85     | Female | Cecum                  | 57×35                   | 3                       | SS    | 0  | 0  | II                  | -                             |
| CC16003     | 51-55     | Female | Rectum                 | 23×22                   | 3                       | SS    | 2  | 0  | IIIB                | -                             |
| CC16005     | 71-75     | Female | Rectosigmoid           | 22×20                   | 2                       | MP    | 1b | 0  | IIIA                | -                             |
| CC16006     | 51-55     | Male   | Sigmoid                | 9×11                    | 1b                      | SM    | 0  | 0  | I                   | -                             |
| CC16008     | 71-75     | Female | Cecum                  | 26×20                   | 2                       | MP    | 1b | 0  | IIIA                | -                             |
| CC16009     | 86-90     | Female | Rectum                 | 60×75                   | 4a                      | SE    | 0  | 0  | II                  | -                             |
| CC16010     | 56-60     | Female | Rectum                 | 35×70                   | 4a                      | AI    | 2b | 1a | IVB                 | Liver                         |
| CC16011     | 51-55     | Female | Sigmoid                | 37×48                   | 4a                      | SE    | 1a | 1a | IVA                 | LN <sup>c</sup>               |
| CC16012     | 56-60     | Female | Sigmoid                | 53×49                   | 3                       | SS    | 0  | 0  | II                  | -                             |
| CC16013     | 76-80     | Female | Rectum                 | 65×50                   | 3                       | SS    | 0  | 0  | II                  | -                             |
| CC16014     | 51-55     | Female | Rectum                 | 85×57                   | 3                       | SS    | 0  | 0  | II                  | -                             |
| CC16015     | 71-75     | Male   | Sigmoid                | 9×11                    | 4b                      | SM    | 0  | 0  | IIC                 | -                             |
| CC16016     | 51-55     | Male   | Sigmoid                | 28×28                   | 3                       | SS    | 1a | 0  | IIIB                | -                             |
| CC16017     | 76-80     | Female | Ascending              | 103×72                  | 3                       | SS    | 1b | 0  | IIIA                | -                             |
| CC16018     | 81-85     | Male   | Ascending              | 42×30                   | 3                       | SS    | X  | 0  | IIA                 | -                             |
| CC16019     | 71-75     | Male   | Transverse             | 110×103                 | 4a                      | SE    | 0  | 0  | IIB                 | -                             |
| CC16020     | 71-75     | Female | Sigmoid                | 35×70                   | 3                       | SS    | 1a | 0  | IIIB                | -                             |
| CC16021     | 71-75     | Male   | Ascending              | 39×42                   | 3                       | SS    | 0  | 0  | IIA                 | -                             |
| CC16022     | 56-60     | Male   | Rectum                 | 50×42                   | 2                       | MP    | 0  | 0  | I                   | -                             |
| CC16023     | 81-85     | Female | Cecum                  | 55×82                   | 3                       | SS    | 2b | 0  | IIIC                | -                             |
| CC16024     | 36-40     | Female | Rectum                 | 61×45                   | 3                       | SS    | 0  | 0  | IIA                 | -                             |
| CC16025     | 71-75     | Male   | Ascending              | 37×26                   | 3                       | SS    | 0  | 0  | IIA                 | -                             |
| CC16026     | 76-80     | Female | Ascending              | 58×49                   | 3                       | SS    | 0  | 0  | IIA                 | -                             |
| CC16027     | 76-80     | Female | Ascending              | 34×29                   | 3                       | SS    | 1  | 0  | IIIA                | -                             |
| CC16028     | 51-55     | Female | Sigmoid                | 20×17                   | 2                       | MP    | 0  | 0  | I                   | -                             |
| CC16029     | 56-60     | Female | Sigmoid                | 46×42                   | 3                       | SS    | 1a | 0  | IIIB                | -                             |
| CC16030     | 66-70     | Male   | Ascending              | 17×20                   | 3                       | SS    | 1b | 0  | IIIB                | -                             |
| CC16031     | 76-80     | Male   | Sigmoid                | 33×30                   | 1                       | CIS   | 0  | 0  | I                   | -                             |

|         |       |        |            |        |    |    |    |   |      |   |
|---------|-------|--------|------------|--------|----|----|----|---|------|---|
| CC16032 | 71-75 | Female | Ascending  | 73×63  | 4a | SE | 1b | 0 | IIIB | - |
| CC16034 | 76-80 | Female | Sigmoid    | 43×60  | 3  | SS | 1a | 0 | IIIB | - |
| CC16035 | 61-65 | Male   | Rectum     | 21×17  | 3  | SS | 2a | 0 | IIIB | - |
| CC16036 | 81-85 | Female | Cecum      | 27×26  | 2  | 1b | 0  | 0 | IIIA | - |
| CC16037 | 51-55 | Female | Sigmoid    | 58×32  | 3  | SS | 0  | 0 | IIA  | - |
| CC16038 | 61-65 | Male   | Ascending  | 32×26  | 3  | SS | 0  | 0 | IIA  | - |
| CC16039 | 81-85 | Male   | Transverse | 27×26  | 3  | SS | 0  | 0 | IIA  | - |
| CC16040 | 71-75 | Female | Sigmoid    | 25×22  | 3  | SS | 0  | 0 | IIA  | - |
| CC16041 | 66-70 | Male   | Rectum     | 35×42  | 3  | SS | 2a | 0 | IIIB | - |
| CC16042 | 66-70 | Female | Sigmoid    | 54×33  | 3  | SS | 2a | 0 | IIIB | - |
| CC16043 | 56-60 | Female | Transverse | 47×28  | 3  | SS | 2a | 0 | IIIB | - |
| CC16044 | 71-75 | Male   | Rectum     | 52×35  | 3  | SS | 0  | 0 | IIA  | - |
| CC16046 | 75-80 | Male   | Sigmoid    | 40×37  | 3  | SS | 0  | 0 | IIA  | - |
| CC16047 | 66-70 | Female | Rectum     | 57×32  | 3  | SS | 0  | 0 | IIA  | - |
| CC16048 | 66-70 | Female | Sigmoid    | 58×32  | 3  | SS | 0  | 0 | IIA  | - |
| CC16049 | 81-85 | Female | Sigmoid    | 53×52  | 3  | SS | 0  | 0 | IIA  | - |
| CC16050 | 66-70 | Female | Transverse | 47×30  | 3  | SS | 0  | 0 | IIA  | - |
| CC16051 | 66-70 | Female | Rectum     | 88×62  | 3  | SS | 0  | 0 | IIA  | - |
| CC16054 | 66-70 | Male   | Ascending  | 35×55  | 3  | SS | 1a | 0 | IIIB | - |
| CC16056 | 56-60 | Male   | Rectum     | 43×60  | 4b | SE | 2b | 0 | IIIC | - |
| CC16057 | 61-65 | Male   | Transverse | 35×52  | 4b | SE | 2a | 0 | IIIC | - |
| CC16058 | 66-70 | Male   | Rectum     | 63×48  | 3  | SS | 0  | 0 | IIA  | - |
| CC16060 | 61-65 | Male   | Rectum     | 80×100 | 3  | SS | 0  | 0 | IIA  | - |

<sup>a</sup> TNM classification, 8th edition

<sup>b</sup> Pathological stage

<sup>c</sup> Nonregional abdominal para-aortic lymph nodes

**Supplementary Table 2. List of genes in the customized panel for CRC.**

|               |              |               |
|---------------|--------------|---------------|
| <i>ACVR2A</i> | <i>DKK2</i>  | <i>NRAS</i>   |
| <i>AMER1</i>  | <i>DKK3</i>  | <i>PIF1</i>   |
| <i>APC</i>    | <i>DKK4</i>  | <i>PIK3CA</i> |
| <i>ARID1A</i> | <i>FBXW7</i> | <i>PTEN</i>   |
| <i>ATM</i>    | <i>FZD3</i>  | <i>RBL1</i>   |
| <i>AXIN2</i>  | <i>FZD10</i> | <i>RNF43</i>  |
| <i>BMP4</i>   | <i>GNAS</i>  | <i>SMAD4</i>  |
| <i>BRAF</i>   | <i>GSK3B</i> | <i>SOX9</i>   |
| <i>CDKN2A</i> | <i>HRAS</i>  | <i>TCF7L2</i> |
| <i>CHD7</i>   | <i>KRAS</i>  | <i>TELO2</i>  |
| <i>CHD8</i>   | <i>LRP5</i>  | <i>TGFBR2</i> |
| <i>CTNNB1</i> | <i>MLH1</i>  | <i>TP53</i>   |
| <i>DKK1</i>   | <i>MSH6</i>  | <i>XAF1</i>   |

**Supplementary Table 3. Primary tumor mutations detected through sequence analysis of Set 2 samples using Ion Proton™ and circulating tumor DNA levels (ctDNA) measured by digital PCR.**

| Case ID | Chromosomal location | Gene          | Variant type        | Base change | Amino acid change | Total allele | Wild type | Mutant allele | Primary VAF <sup>a</sup> (%) | dPCR <sup>b</sup> | pre ctDNA <sup>c</sup> (%) |
|---------|----------------------|---------------|---------------------|-------------|-------------------|--------------|-----------|---------------|------------------------------|-------------------|----------------------------|
| CC16002 | chr12:25398280       | <i>KRAS</i>   | missense            | c.37G>T     | p.G13C            | 1995         | 1790      | 205           | 10.3                         | yes               | 0                          |
|         | chrX:63411678        | <i>AMER1</i>  | nonsense            | c.1489C>T   | p.R497*           | 1997         | 1385      | 612           | 30.6                         |                   |                            |
| CC16003 | chr5:112175639       | <i>APC</i>    | nonsense            | c.4348C>T   | p.R1450*          | 1999         | 1021      | 978           | 48.9                         |                   |                            |
|         | chr17:7578256        | <i>TP53</i>   | nonsense            | c.586C>T    | p.R196*           | 1948         | 1025      | 923           | 47.4                         | yes               | 0.43                       |
| CC16006 | chr14:21868397       | <i>CHD8</i>   | missense            | c.4640A>G   | p.H1547R          | 1998         | 1586      | 412           | 20.62                        |                   |                            |
|         | chr12:25398283       | <i>KRAS</i>   | missense            | c.34G>T     | p.G12C            | 1998         | 1779      | 218           | 10.91                        | yes               | 0                          |
|         | chr17:7578368        | <i>TP53</i>   | splice_3            | c.559+3G>C  |                   | 1920         | 1543      | 376           | 19.6                         |                   |                            |
| CC16009 | chr17:63554007       | <i>AXIN2</i>  | frameshift deletion | c.731delC   | p.S244fs          | 1991         | 1228      | 763           | 38.3                         |                   |                            |
|         | chr12:25398283       | <i>KRAS</i>   | missense            | c.35G>A     | p.G12D            | 1997         | 1459      | 538           | 26.9                         | yes               | 0.25                       |
|         | chr2:48027519        | <i>MSH6</i>   | missense            | c.2397G>A   | p.M799I           | 2000         | 1677      | 323           | 16.2                         |                   |                            |
|         | chr17:7578368        | <i>TP53</i>   | splice_3            | c.559+3G>C  |                   | 1910         | 1274      | 635           | 33.2                         |                   |                            |
| CC16017 | chr5:112175639       | <i>APC</i>    | nonsense            | c.4348C>T   | p.R1450*          | 1996         | 1081      | 915           | 45.8                         |                   |                            |
|         | chr5:112173914       | <i>APC</i>    | nonsense            | c.2623A>T   | p.K875*           | 1999         | 1167      | 832           | 41.6                         |                   |                            |
|         | chr3:41278106        | <i>CTNNB1</i> | missense            | c.1982G>T   | p.R661L           | 1998         | 1101      | 897           | 44.9                         |                   |                            |
|         | chr12:25378561       | <i>KRAS</i>   | missense            | c.437C>T    | p.A146V           | 1550         | 869       | 681           | 43.9                         |                   |                            |

|         |                |        |                           |                    |           |      |      |      |       |     |      |
|---------|----------------|--------|---------------------------|--------------------|-----------|------|------|------|-------|-----|------|
|         | chr1:115258745 | NRAS   | missense                  | c.37G>C            | p.G13R    | 2000 | 1492 | 506  | 25.3  |     |      |
|         | chr3:178936082 | PIK3CA | missense                  | c.1624G>A          | p.E542K   | 1318 | 1017 | 301  | 22.8  | yes | 0    |
|         | chr5:112175672 | APC    | frameshift deletion       | c.4391_4394delAGAG | p.E1464fs | 1949 | 1525 | 423  | 21.70 |     |      |
| CC16018 | chr5:112174631 | APC    | nonsense                  | c.3340C>T          | p.R1114*  | 1999 | 1589 | 410  | 20.51 |     |      |
|         | chr17:7577546  | TP53   | missense                  | c.733G>A           | p.G245S   | 1993 | 1421 | 570  | 28.60 | yes | 0.18 |
|         | chr7:140453133 | BRAF   | missense                  | c.1799T>A          | p.V600E   | 1980 | 1632 | 347  | 17.53 | yes | 11.9 |
| CC16019 | chr17:7577120  | TP53   | missense                  | c.818G>A           | p.R273H   | 1966 | 1165 | 801  | 40.74 | yes | 4.57 |
|         | chr5:112151261 | APC    | missense                  | c.904C>T           | p.R302*   | 1998 | 1107 | 891  | 44.59 | yes | 0.17 |
| CC16020 | chr17:7578474  | TP53   | missense                  | c.451C>G           | p.P151A   | 1616 | 809  | 803  | 49.69 | yes | 0.75 |
|         | chr7:140453155 | BRAF   | missense                  | c.1780G>C          | p.D594H   | 1991 | 1507 | 484  | 24.31 | yes | 0    |
| CC16021 | chr20:57485014 | GNAS   | missense                  | c.848G>A           | p.R283H   | 1998 | 1556 | 442  | 22.12 |     |      |
|         | chr12:25378562 | KRAS   | missense                  | c.436G>A           | p.A146T   | 1999 | 1762 | 237  | 11.86 |     |      |
|         | chr5:112128203 | APC    | nonsense                  | c.706C>T           | p.Q236*   | 1999 | 1612 | 387  | 19.36 |     |      |
|         | chr4:153247376 | FBXW7  | nonframeshift<br>deletion | c.1423_1425delGTT  | p.V475del | 1984 | 1114 | 870  | 43.85 |     |      |
| CC16022 | chr4:153332760 | FBXW7  | frameshift insertion      | c.195_196insGA     | p.P66fs   | 1997 | 1522 | 475  | 23.79 |     |      |
|         | chr12:25398280 | KRAS   | missense                  | c.38G>A            | p.G13D    | 1997 | 1050 | 944  | 47.27 | yes | 0.55 |
|         | chr17:7578474  | TP53   | missense                  | c.451C>A           | p.P151T   | 1978 | 782  | 1194 | 60.36 |     |      |
| CC16024 | chr2:148683611 | ACVR2A | nonsense                  | c.1228G>T          | p.E410*   | 1893 | 1278 | 615  | 32.49 |     |      |



|                 |        |          |           |          |      |      |     |       |     |   |
|-----------------|--------|----------|-----------|----------|------|------|-----|-------|-----|---|
| chr5:112175046  | APC    | missense | c.3755C>A | p.S1252Y | 1914 | 862  | 653 | 34.12 |     |   |
| chr1:27106178   | ARID1A | nonsense | c.5789C>A | p.S1930* | 1092 | 807  | 285 | 26.10 |     |   |
| chr11:108202715 | ATM    | missense | c.7739G>T | p.R2580I | 1997 | 1418 | 579 | 28.99 |     |   |
| chr11:108196939 | ATM    | missense | c.6962C>T | p.A2321V | 1998 | 1471 | 527 | 26.38 |     |   |
| chr14:21871721  | CHD8   | missense | c.3409C>A | p.L1137I | 1999 | 1461 | 538 | 26.91 |     |   |
| chr14:21860965  | CHD8   | missense | c.6472C>T | p.R2158C | 1993 | 1491 | 502 | 25.19 |     |   |
| chr3:41277291   | CTNNB1 | missense | c.1760G>A | p.R587Q  | 1998 | 1352 | 646 | 32.33 |     |   |
| chr3:41266232   | CTNNB1 | nonsense | c.229G>T  | p.E77*   | 1994 | 1441 | 553 | 27.73 |     |   |
| chr8:42231798   | DKK4   | missense | c.495T>G  | p.I165M  | 1431 | 1172 | 259 | 18.10 |     |   |
| chr4:153244184  | FBXW7  | missense | c.1973G>A | p.R658Q  | 1977 | 1405 | 572 | 28.93 |     |   |
| chr4:153332915  | FBXW7  | missense | c.41G>A   | p.R14Q   | 1979 | 1463 | 516 | 26.07 |     |   |
| chr12:130648241 | FZD10  | missense | c.754G>A  | p.D252N  | 1991 | 1407 | 584 | 29.33 |     |   |
| chr12:130648713 | FZD10  | missense | c.1226G>A | p.G409D  | 1999 | 1457 | 542 | 27.11 |     |   |
| chr12:130647576 | FZD10  | missense | c.89G>A   | p.G30D   | 1844 | 1509 | 335 | 18.17 |     |   |
| chr3:119624687  | GSK3B  | missense | c.728C>T  | p.A243V  | 694  | 507  | 187 | 26.95 |     |   |
| chr2:48027661   | MSH6   | nonsense | c.2539G>T | p.E847*  | 203  | 129  | 74  | 36.45 | yes | 0 |
| chr3:178916716  | PIK3CA | nonsense | c.103G>T  | p.E35*   | 1391 | 972  | 419 | 30.12 |     |   |
| chr3:178922301  | PIK3CA | missense | c.1070G>A | p.R357Q  | 2000 | 1446 | 554 | 27.70 |     |   |
| chr3:178916642  | PIK3CA | missense | c.29T>G   | p.L10R   | 2000 | 1593 | 407 | 20.35 |     |   |

|         |                 |        |                      |                       |           |      |      |      |       |     |      |
|---------|-----------------|--------|----------------------|-----------------------|-----------|------|------|------|-------|-----|------|
|         | chr10:89692895  | PTEN   | missense             | c.389G>A              | p.R130Q   | 1972 | 1462 | 510  | 25.86 |     |      |
|         | chr17:56435626  | RNF43  | missense             | c.1511A>G             | p.D504G   | 1999 | 1729 | 270  | 13.51 |     |      |
|         | chr18:48603033  | SMAD4  | missense             | c.1334G>A             | p.R445Q   | 1402 | 1023 | 379  | 27.03 |     |      |
|         | chr17:6676434   | XAF1   | missense             | c.852G>T              | p.E284D   | 365  | 304  | 61   | 16.71 |     |      |
| CC16025 | chrX:63410048   | AMER1  | missense             | c.3119C>A             | p.A1040D  | 2000 | 1773 | 227  | 11.35 | yes | 0    |
|         | chr20:57484420  | GNAS   | missense             | c.601C>T              | p.R201C   | 1999 | 1441 | 558  | 27.91 |     |      |
|         | chr12:25378562  | KRAS   | missense             | c.436G>A              | p.A146T   | 1999 | 590  | 1409 | 70.49 |     |      |
| CC16028 | chr3:178936091  | PIK3CA | missense             | c.1633G>A             | p.E545K   | 1999 | 1161 | 838  | 41.92 | yes | 0    |
|         | chr10:114912175 | TCF7L2 | frameshift deletion  | c.1247delG            | p.G416fs  | 1991 | 946  | 1045 | 52.49 |     |      |
|         | chr17:7578443   | TP53   | missense             | c.476C>T              | p.A159V   | 1932 | 596  | 1336 | 69.15 |     |      |
|         | chr5:112173917  | APC    | nonsense             | c.2626C>T             | p.R876*   | 2000 | 1535 | 465  | 23.25 | yes | 0    |
| CC16029 | chr5:112175628  | APC    | frameshift deletion  | c.4338delT            | p.Q1447fs | 1987 | 1533 | 454  | 22.85 |     |      |
|         | chr4:153258983  | FBXW7  | nonsense             | c.832C>T              | p.R278*   | 1653 | 1285 | 368  | 22.26 |     |      |
|         | chr17:7578490   | TP53   | nonsense             | c.438G>A              | p.W146*   | 1824 | 1203 | 621  | 34.05 |     |      |
|         | chrX:63411969   | AMER1  | nonsense             | c.1198G>T             | p.E400*   | 1568 | 484  | 1084 | 69.13 |     |      |
|         | chr5:112176020  | APC    | nonsense             | c.4729G>T             | p.E1577*  | 959  | 633  | 326  | 33.99 |     |      |
| CC16030 | chr5:112173736  | APC    | frameshift Insertion | c.2454_2455insTGGCAAC | p.M819fs  | 1996 | 1641 | 355  | 17.79 |     |      |
|         | chr12:25378561  | KRAS   | missense             | c.437C>T              | p.A146V   | 1993 | 728  | 1265 | 63.47 | yes | 0.51 |
|         | chr10:89720665  | PTEN   | nonsense             | c.821G>A              | p.W274*   | 212  | 122  | 90   | 42.45 |     |      |

|         |                |               |                      |                |           |      |      |      |       |     |      |
|---------|----------------|---------------|----------------------|----------------|-----------|------|------|------|-------|-----|------|
|         | chr17:7577021  | <i>TP53</i>   | nonsense             | c.916C>T       | p.R306*   | 2000 | 1100 | 900  | 45.00 | yes | 0    |
| CC16031 | chr17:70117936 | <i>SOX9</i>   | missense             | c.404T>A       | p.L135H   | 1997 | 1762 | 235  | 11.77 | yes | 0.06 |
|         | chrX:63412020  | <i>AMER1</i>  | nonsense             | c.1147G>T      | p.E383*   | 1999 | 1385 | 614  | 30.72 |     |      |
|         | chr5:112174682 | <i>APC</i>    | nonsense             | c.3391C>T      | p.Q1131*  | 1998 | 1629 | 369  | 18.47 |     |      |
| CC16036 | chr12:25398280 | <i>KRAS</i>   | missense             | c.38G>A        | p.G13D    | 1996 | 1534 | 462  | 23.15 | yes | 0.22 |
|         | chr11:68179025 | <i>LRP5</i>   | missense             | c.2440G>A      | p.A814T   | 1994 | 1754 | 240  | 12.04 |     |      |
|         | chr3:178936094 | <i>PIK3CA</i> | missense             | c.1636C>A      | p.Q546K   | 545  | 408  | 137  | 25.14 |     |      |
|         | chr17:7577156  | <i>TP53</i>   | splice_5             | c.783-1G>A     |           | 1972 | 1348 | 624  | 31.64 |     |      |
| CC16037 | chr5:112170648 | <i>APC</i>    | nonsense             | c.1744G>T      | p.E582*   | 2000 | 1680 | 320  | 16.00 |     |      |
|         | chr17:7577556  | <i>TP53</i>   | missense             | c.722C>G       | p.S241C   | 1978 | 1187 | 788  | 39.84 | yes | 0.27 |
| CC16038 | chr12:25398280 | <i>KRAS</i>   | missense             | c.38G>A        | p.G13D    | 1998 | 1822 | 176  | 8.81  | yes | 0    |
| CC16039 | chr15:65116026 | <i>PIF1</i>   | missense             | c.509C>T       | p.T170M   | 813  | 656  | 157  | 19.31 |     |      |
|         | chr17:7577553  | <i>TP53</i>   | frameshift Insertion | c.714_715insGT | p.N239fs  | 1492 | 666  | 825  | 55.29 | yes | 0    |
|         | chr5:112173917 | <i>APC</i>    | nonsense             | c.2626C>T      | p.R876*   | 1997 | 857  | 1140 | 57.09 | yes | 0    |
|         | chr1:27107138  | <i>ARID1A</i> | frameshift deletion  | c.6750delG     | p.E2250fs | 1998 | 1231 | 767  | 38.39 |     |      |
| CC16040 | chr12:25398283 | <i>KRAS</i>   | missense             | c.35G>A        | p.G12D    | 1999 | 1255 | 744  | 37.22 | yes | 13.2 |
|         | chr3:178936095 | <i>PIK3CA</i> | missense             | c.1637A>G      | p.Q546R   | 697  | 273  | 424  | 60.83 |     |      |
|         | chr17:7578256  | <i>TP53</i>   | missense             | c.584T>C       | p.I195T   | 1949 | 797  | 1152 | 59.11 |     |      |

|         |                 |               |                     |            |          |      |      |      |       |     |      |
|---------|-----------------|---------------|---------------------|------------|----------|------|------|------|-------|-----|------|
| CC16044 | chr5:112116592  | <i>APC</i>    | nonsense            | c.637C>T   | p.R213*  | 1687 | 727  | 960  | 56.91 | yes | 1.73 |
|         | chr4:153249511  | <i>FBXW7</i>  | missense            | c.1267G>A  | p.G423R  | 1998 | 1280 | 718  | 35.94 |     |      |
| CC16046 | chr5:112173718  | <i>APC</i>    | frameshift deletion | c.2428delA | p.R810fs | 1995 | 1195 | 800  | 40.10 |     |      |
|         | chr5:112128141  | <i>APC</i>    | spliceite_5         | c.646-2A>G |          | 1065 | 668  | 397  | 37.28 |     |      |
|         | chr12:25398283  | <i>KRAS</i>   | missense            | c.35G>A    | p.G12D   | 1997 | 1209 | 784  | 39.26 | yes | 0    |
|         | chr3:178952085  | <i>PIK3CA</i> | missense            | c.3140A>G  | p.H1047R | 1999 | 1210 | 788  | 39.42 | yes | 0.84 |
| CC16047 | chr5:112128143  | <i>APC</i>    | nonsense            | c.646C>T   | p.R216*  | 1083 | 393  | 690  | 63.71 |     |      |
|         | chr15:65112165  | <i>PIF1</i>   | missense            | c.1214G>A  | p.R405H  | 1905 | 1357 | 548  | 28.77 |     |      |
|         | chr3:178936091  | <i>PIK3CA</i> | missense            | c.1633G>A  | p.E545K  | 671  | 452  | 219  | 32.64 | yes | 0    |
| CC16048 | chr7:140453133  | <i>BRAF</i>   | missense            | c.1799T>A  | p.V600E  | 1979 | 881  | 1096 | 55.38 | yes | 0    |
|         | chr4:153258983  | <i>FBXW7</i>  | nonsense            | c.832C>T   | p.R278*  | 1999 | 1243 | 756  | 37.82 |     |      |
|         | chr12:130648458 | <i>FZD10</i>  | missense            | c.971C>T   | p.S324L  | 2000 | 1229 | 771  | 38.55 |     |      |
|         | chr17:7579348   | <i>TP53</i>   | frameshift deletion | c.338delT  | p.F113fs | 1992 | 1266 | 724  | 36.35 |     |      |
| CC16049 | chr12:25398283  | <i>KRAS</i>   | missense            | c.35G>T    | p.G12V   | 2000 | 1250 | 747  | 37.35 | yes | 0    |
|         | chr17:7577528   | <i>TP53</i>   | missense            | c.742C>T   | p.R248W  | 1963 | 576  | 1386 | 70.61 |     |      |
| CC16050 | chr5:112174580  | <i>APC</i>    | nonsense            | c.3289G>T  | p.E1097* | 1997 | 1214 | 783  | 39.21 |     |      |
|         | chr14:21876575  | <i>CHD8</i>   | nonsense            | c.2626C>T  | p.R876*  | 1997 | 882  | 1115 | 55.83 |     |      |
|         | chr4:153247367  | <i>FBXW7</i>  | nonsense            | c.1435C>T  | p.R479*  | 1765 | 1210 | 555  | 31.44 |     |      |

|                |      |          |          |         |      |     |      |       |     |   |
|----------------|------|----------|----------|---------|------|-----|------|-------|-----|---|
| chr17:70117938 | SOX9 | missense | c.406A>G | p.S136G | 2000 | 738 | 1262 | 63.10 |     |   |
| chr17:7577580  | TP53 | missense | c.701A>G | p.Y234C | 1980 | 534 | 1446 | 73.03 | yes | 0 |

---

<sup>a</sup> Variant allele frequency

<sup>b</sup> Plasma DNA was evaluated by dPCR

<sup>c</sup> Pretreatment circulating tumor DNA

**Supplementary Table 4. Primary tumor mutations detected through sequence analysis of Set 3 using Ion 5S™ and circulating tumor DNA (ctDNA) levels measured by digital PCR.**

| Case ID | Chromosomal location | Gene          | Variant type         | Base change      | Amino acid change | Total allele | Wild type | Mutant allele | Primary VAF <sup>a</sup> (%) | dPCR <sup>b</sup> | pre ctDNA <sup>c</sup> (%) |
|---------|----------------------|---------------|----------------------|------------------|-------------------|--------------|-----------|---------------|------------------------------|-------------------|----------------------------|
| CC16010 | chr17:7675108        | <i>TP53</i>   | frameshift insertion | c.107_108insAGCA | p.H36Qfs*14       | 4610         | 2983      | 981           | 21.11                        | yes               | 8.54                       |
| CC16012 | chr5:112839729       | <i>APC</i>    | stopgain             | c.G4135T         | p.E1379*          | 3959         | 2075      | 1880          | 47.49                        |                   |                            |
|         | chr12:25245350       | <i>KRAS</i>   | nonsynonymous        | c.G35T           | p.G12V            | 7680         | 3872      | 3802          | 49.51                        | yes               | 0.51                       |
|         | chr20:37035354       | <i>RBL1</i>   | frameshift insertion | c.776dupC        | p.S260Ffs*6       | 4520         | 3858      | 1198          | 23.58                        |                   |                            |
|         | chr17:7675232        | <i>TP53</i>   | nonsynonymous        | c.C380A          | p.S127Y           | 3021         | 605       | 2384          | 78.91                        | yes               | 0.19                       |
| CC16013 | chr11:108335029      | <i>ATM</i>    | nonsynonymous        | c.C8071T         | p.R2691C          | 3427         | 2342      | 983           | 29.53                        |                   |                            |
|         | chr7:140753336       | <i>BRAF</i>   | nonsynonymous        | c.T1799A         | p.V600E           | 5149         | 3438      | 1697          | 32.95                        | yes               | 0                          |
|         | chr20:58855061       | <i>GNAS</i>   | nonsynonymous        | c.G1796A         | p.R599H           | 4196         | 2611      | 1576          | 37.55                        |                   |                            |
|         | chr3:179234297       | <i>PIK3CA</i> | nonsynonymous        | c.A3140G         | p.H1047R          | 5276         | 3295      | 1969          | 37.26                        | yes               | 0                          |
|         | chr17:58362564       | <i>RNF43</i>  | nonsynonymous        | c.C667T          | p.R223C           | 2587         | 1341      | 1245          | 48.13                        |                   |                            |
|         | chr10:113165642      | <i>TCF7L2</i> | frameshift deletion  | c.1411delC       | p.S473Pfs*5       | 2148         | 1442      | 671           | 30.74                        |                   |                            |
| CC16014 | chr5:112839693       | <i>APC</i>    | frameshift insertion | c.4046dupA       | p.T1350Dfs*7      | 2540         | 1707      | 837           | 32.66                        | yes               | 8.3                        |
|         | chr14:21393628       | <i>CHD8</i>   | nonsynonymous        | c.G6167A         | p.R2056Q          | 2700         | 1565      | 1112          | 41.12                        |                   |                            |
|         | chr17:7675131        | <i>TP53</i>   | nonsynonymous        | c.G481A          | p.A161T           | 2370         | 1545      | 814           | 34.39                        | yes               | 8.68                       |
| CC16015 | chr11:108229288      | <i>ATM</i>    | nonsynonymous        | c.G296A          | p.S99N            | 2630         | 2047      | 558           | 21.17                        |                   |                            |

|         |                 |               |                      |                |              |      |      |      |       |     |      |
|---------|-----------------|---------------|----------------------|----------------|--------------|------|------|------|-------|-----|------|
|         | chr11:108229289 | <i>ATM</i>    | nonsynonymous        | c.T297G        | p.S99R       | 2543 | 1999 | 543  | 21.36 |     |      |
|         | chr7:140800366  | <i>BRAF</i>   | nonsynonymous        | c.A976G        | p.I326V      | 6118 | 2861 | 3254 | 53.17 |     |      |
|         | chr3:37025979   | <i>MLH1</i>   | stopgain             | c.A658T        | p.K220*      | 2536 | 1912 | 620  | 24.45 |     |      |
|         | chr17:58358121  | <i>RNF43</i>  | nonsynonymous        | c.G1274A       | p.R425H      | 7705 | 5986 | 1689 | 21.95 |     |      |
|         | chr17:58358788  | <i>RNF43</i>  | stopgain             | c.C988T        | p.R330*      | 1226 | 249  | 32   | 11.27 | yes | 2.43 |
|         | chr17:58363351  | <i>RNF43</i>  | nonsynonymous        | c.C125A        | p.A42D       | 2536 | 1912 | 620  | 24.45 |     |      |
| CC16026 | chr5:112775687  | <i>APC</i>    | stopgain             | c.C481T        | p.Q161*      | 2430 | 1392 | 1027 | 42.21 |     |      |
|         | chr12:25245350  | <i>KRAS</i>   | nonsynonymous        | c.G35A         | p.G12D       | 7144 | 5172 | 1967 | 27.54 | yes | 0    |
| CC16027 | chr5:112839942  | <i>APC</i>    | stopgain             | c.C4348T       | p.R1450*     | 3185 | 2036 | 1148 | 36.02 |     |      |
|         | chr12:25245350  | <i>KRAS</i>   | nonsynonymous        | c.G35T         | p.G12V       | 5261 | 3070 | 2188 | 41.6  | yes | 0    |
|         | chr17:7675180   | <i>TP53</i>   | frameshift insertion | c.35_36insTGCA | p.Q12Hfs*6   | 2962 | 1151 | 1804 | 60.42 | yes | 0.27 |
| CC16032 | chr5:112839879  | <i>APC</i>    | stopgain             | c.C4285T       | p.Q1429*     | 2611 | 1315 | 1265 | 48.37 |     |      |
|         | chr1:26772550   | <i>ARID1A</i> | frameshift deletion  | c.3458delC     | p.M1154Wfs*7 | 2596 | 1311 | 1291 | 49.43 |     |      |
|         | chr17:65537787  | <i>AXIN2</i>  | nonsynonymous        | c.G1249T       | p.A417S      | 2424 | 1763 | 518  | 22.7  |     |      |
|         | chr1:114713909  | <i>NRAS</i>   | nonsynonymous        | c.C181A        | p.Q61K       | 3255 | 2100 | 1053 | 33.31 | yes | 21.6 |
|         | chr3:179218303  | <i>PIK3CA</i> | nonsynonymous        | c.G1633A       | p.E545K      | 1015 | 766  | 249  | 24.53 | yes | 11.8 |
|         | chr18:51078425  | <i>SMAD4</i>  | frameshift deletion  | c.1618delC     | p.L540Ffs*12 | 2693 | 1435 | 1279 | 47.02 |     |      |
|         | chr17:72121597  | <i>SOX9</i>   | frameshift deletion  | c.207delC      | p.V71Cfs*39  | 2040 | 1510 | 462  | 22.42 |     |      |
|         | chr17:7673763   | <i>TP53</i>   | frameshift deletion  | c.460delG      | p.E154Kfs*59 | 1751 | 856  | 899  | 51.17 | yes | 0.19 |

|         |                |               |                      |            |               |      |      |      |       |     |      |
|---------|----------------|---------------|----------------------|------------|---------------|------|------|------|-------|-----|------|
| CC16051 | chr5:112839117 | <i>APC</i>    | stopgain             | c.C3523T   | p.Q1175*      | 4098 | 3380 | 707  | 17.21 |     |      |
|         | chr17:7675088  | <i>TP53</i>   | nonsynonymous        | c.G524A    | p.R175H       | 7057 | 6177 | 872  | 12.34 | yes | 0.31 |
|         | chrX:64192215  | <i>AMER1</i>  | stopgain             | c.C1072T   | p.R358*       | 3751 | 770  | 2980 | 79.42 |     |      |
|         | chrX:64191813  | <i>AMER1</i>  | frameshift insertion | c.1473dupC | p.R492Qfs*16  | 1573 | 1447 | 372  | 20.26 |     |      |
|         | chrX:64191986  | <i>AMER1</i>  | frameshift insertion | c.1300dupC | p.H434Pfs*7   | 499  | 265  | 268  | 49.91 |     |      |
|         | chrX:64192785  | <i>AMER1</i>  | frameshift insertion | c.501dupA  | p.G168Rfs*7   | 287  | 141  | 193  | 57.78 |     |      |
|         | chrX:64193123  | <i>AMER1</i>  | frameshift insertion | c.163dupA  | p.T55Nfs*17   | 2999 | 2365 | 707  | 22.91 |     |      |
|         | chr5:112838455 | <i>APC</i>    | stopgain             | c.T2861A   | p.L954*       | 4502 | 2996 | 1494 | 33.11 |     |      |
|         | chr5:112840155 | <i>APC</i>    | stopgain             | c.G4561T   | p.E1521*      | 3346 | 2651 | 682  | 20.36 |     |      |
|         | chr5:112840372 | <i>APC</i>    | nonsynonymous        | c.A4724G   | p.K1575R      | 645  | 566  | 77   | 11.94 |     |      |
| CC16054 | chr5:112841875 | <i>APC</i>    | nonsynonymous        | c.C6281T   | p.P2094L      | 4071 | 3606 | 461  | 11.32 |     |      |
|         | chr5:112819329 | <i>APC</i>    | frameshift insertion | c.1244dupA | p.D416Gfs*10  | 941  | 711  | 296  | 29.37 |     |      |
|         | chr5:112840383 | <i>APC</i>    | frameshift insertion | c.4736dupC | p.A1580Cfs*34 | 588  | 484  | 191  | 28.25 |     |      |
|         | chr1:26773683  | <i>ARID1A</i> | nonsynonymous        | c.T3970C   | p.Y1324H      | 1768 | 1573 | 187  | 10.56 |     |      |
|         | chr1:26773685  | <i>ARID1A</i> | stopgain             | c.C3972A   | p.Y1324*      | 1482 | 1238 | 204  | 14.14 |     |      |
|         | chr1:26779587  | <i>ARID1A</i> | nonsynonymous        | c.C5689G   | p.P1897A      | 1764 | 903  | 370  | 28.95 |     |      |
|         | chr1:26774569  | <i>ARID1A</i> | frameshift insertion | c.4343dupC | p.G1449Rfs*42 | 546  | 297  | 297  | 49.25 |     |      |
|         | chr1:26774597  | <i>ARID1A</i> | frameshift insertion | c.4371dupC | p.Q1458Pfs*33 | 634  | 390  | 267  | 40.39 |     |      |
|         | chr1:26774620  | <i>ARID1A</i> | frameshift insertion | c.4394dupC | p.A1466Cfs*25 | 830  | 643  | 236  | 26.85 |     |      |



|                 |               |                      |                 |               |      |      |      |       |     |   |
|-----------------|---------------|----------------------|-----------------|---------------|------|------|------|-------|-----|---|
| chr11:108244102 | <i>ATM</i>    | frameshift insertion | c.646_647insT   | p.A216Vfs*38  | 1826 | 1183 | 626  | 33.23 |     |   |
| chr11:108281146 | <i>ATM</i>    | frameshift insertion | c.3555dupA      | p.E1186Rfs*14 | 850  | 547  | 349  | 38.86 |     |   |
| chr8:60852937   | <i>CHD7</i>   | frameshift deletion  | c.6213delC      | p.Q2073Sfs*71 | 1740 | 1153 | 561  | 31.22 |     |   |
| chr8:60865588   | <i>CHD7</i>   | frameshift insertion | c.2503dupC      | p.S836Lfs*56  | 1880 | 801  | 1108 | 57.29 |     |   |
| chr14:21391024  | <i>CHD8</i>   | stopgain             | c.A7105T        | p.K2369X      | 1101 | 937  | 150  | 13.57 |     |   |
| chr20:58853838  | <i>GNAS</i>   | nonsynonymous        | c.T386C         | p.L129P       | 2997 | 1550 | 1441 | 48.03 |     |   |
| chr12:25245350  | <i>KRAS</i>   | nonsynonymous        | c.G35A          | p.G12D        | 7392 | 3692 | 3700 | 50.05 | yes | 0 |
| chr12:25225691  | <i>KRAS</i>   | frameshift insertion | c.372dupA       | p.V125Sfs*19  | 837  | 601  | 337  | 35.93 |     |   |
| chr11:68390006  | <i>LRP5</i>   | frameshift insertion | c.1539dupG      | p.E514Gfs*20  | 818  | 603  | 244  | 28.74 |     |   |
| chr11:68403698  | <i>LRP5</i>   | frameshift insertion | c.1801dupG      | p.T602Nfs*35  | 317  | 235  | 88   | 27.16 |     |   |
| chr11:68425992  | <i>LRP5</i>   | frameshift insertion | c.1699_1700insG | p.T567Sfs*73  | 1545 | 953  | 714  | 41.34 |     |   |
| chr3:37025946   | <i>MLH1</i>   | nonsynonymous        | c.G625A         | p.D209N       | 2946 | 2222 | 721  | 24.47 |     |   |
| chr3:37025947   | <i>MLH1</i>   | nonsynonymous        | c.A626G         | p.D209G       | 4189 | 3242 | 725  | 17.1  |     |   |
| chr3:37050487   | <i>MLH1</i>   | stopgain             | c.1899dupT      | p.E634*       | 2225 | 1589 | 1217 | 43.28 |     |   |
| chr3:179204536  | <i>PIK3CA</i> | nonsynonymous        | c.G1093A        | p.E365K       | 1706 | 1190 | 508  | 29.85 |     |   |
| chr10:87952121  | <i>PTEN</i>   | frameshift insertion | c.497dupT       | p.T167Nfs*13  | 3258 | 2607 | 854  | 24.64 |     |   |
| chr17:72124335  | <i>SOX9</i>   | frameshift insertion | c.1479dupC      | p.S494Qfs*84  | 3009 | 2262 | 857  | 27.25 |     |   |
| chr10 :13141234 | <i>TCF7L2</i> | frameshift insertion | c.175dupC       | p.L60Sfs*7    | 2834 | 2365 | 1314 | 35.39 |     |   |
| chr17:7675140   | <i>TP53</i>   | nonsynonymous        | c.C472T         | p.R158C       | 2243 | 1395 | 846  | 37.72 |     |   |

|         |                |               |                            |                 |                 |      |      |      |       |     |      |
|---------|----------------|---------------|----------------------------|-----------------|-----------------|------|------|------|-------|-----|------|
|         | chr5:112838007 | <i>APC</i>    | stopgain                   | c.C2413T        | p.R805*         | 3842 | 3363 | 473  | 12.32 |     |      |
| CC16056 | chr12:25245350 | <i>KRAS</i>   | nonsynonymous              | c.G35C          | p.G12A          | 7850 | 5479 | 2367 | 30.15 | yes | 0.43 |
|         | chr17:7673776  | <i>TP53</i>   | nonsynonymous              | c.C844T         | p.R282W         | 2675 | 1866 | 807  | 30.17 | yes | 0.11 |
| CC16057 | chr17:7674894  | <i>TP53</i>   | stopgain                   | c.C637T         | p.R213*         | 6914 | 5266 | 1456 | 21.14 | yes | 0    |
|         | chr17:7675237  | <i>TP53</i>   | splicing                   | c.376-1G>A      |                 | 2716 | 2013 | 703  | 25.87 |     |      |
|         | chr2:147926138 | <i>ACVR2A</i> | nonsynonymous              | c.A1000G        | p.R334G         | 828  | 721  | 107  | 12.92 |     |      |
|         | chrX:64192583  | <i>AMER1</i>  | nonsynonymous              | c.C704T         | p.P235L         | 250  | 42   | 34   | 44.74 |     |      |
|         | chr5:112780895 | <i>APC</i>    | stopgain                   | c.C637T         | p.R213*         | 3101 | 2512 | 583  | 18.78 |     |      |
| CC16058 | chr7:140924640 | <i>BRAF</i>   | nonsynonymous              | c.G64A          | p.D22N          | 3979 | 1662 | 2299 | 58.04 |     |      |
|         | chr4:152328232 | <i>FBXW7</i>  | nonsynonymous              | c.G1394A        | p.R465H         | 7171 | 5373 | 1796 | 25.03 |     |      |
|         | chr12:25245350 | <i>KRAS</i>   | nonsynonymous              | c.G35C          | p.G12A          | 7807 | 6214 | 1591 | 20.38 | yes | 0    |
|         | chr17:7673775  | <i>TP53</i>   | nonframeshift<br>insertion | c.448_449insACC | p.D149_R150insH | 3013 | 2195 | 813  | 26.89 | yes | 2.05 |
| CC16060 | chr17:7673802  | <i>TP53</i>   | nonsynonymous              | c.G818A         | p.R273H         | 6995 | 1890 | 5098 | 72.85 | yes | 1.22 |

<sup>a</sup> Variant allele frequency,

<sup>b</sup> Plasma DNA was evaluated by dPCR,

<sup>c</sup> Variant circulating tumor DNA

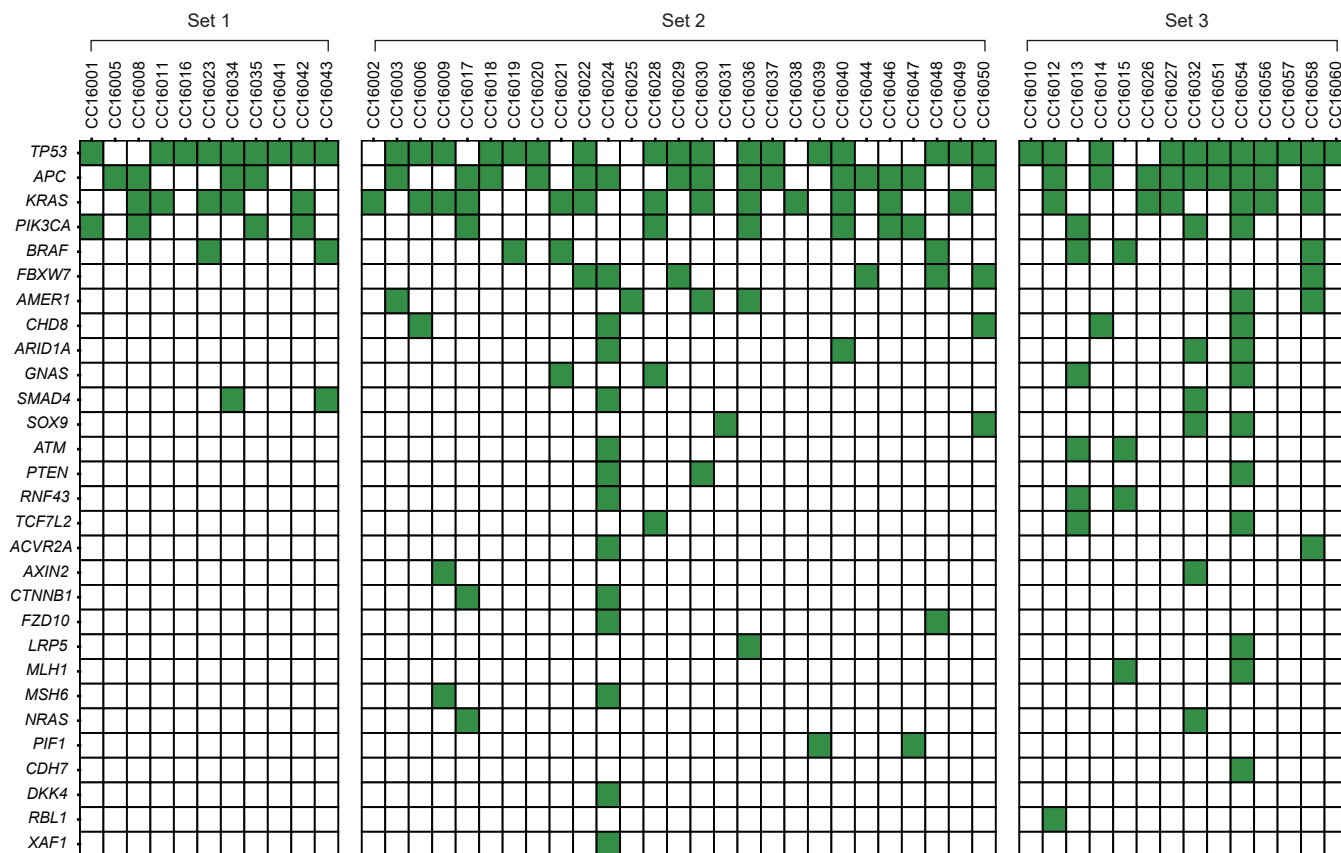

**Supplementary Figure 1. Somatic mutation profile of primary CRC tumors from the 52 patients in the study cohort.**

Mutated genes that satisfied the criteria of each set are shown. The top row indicates the patient ID. Genes listed in the custom panel (Supplementary Table S2) are arranged on the left side of the panel. The detailed mutation profile for Set 1 is available in our previous report (Ref. 31 in the main text). Green boxes indicate the presence of mutations.

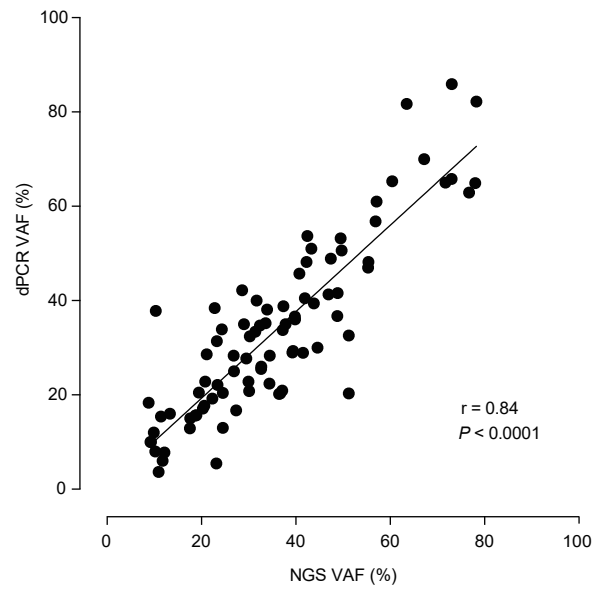

**Supplementary Figure 2. Correlation between primary tumor VAFs measured by NGS and dPCR.**

Strong positive correlations between NGS and dPCR VAFs were observed in primary tumor DNA ( $r = 0.84$ , Spearman' s rank correlation coefficient). VAF, variant allele frequency; NGS, next generation sequencing; dPCR, digital PCR.

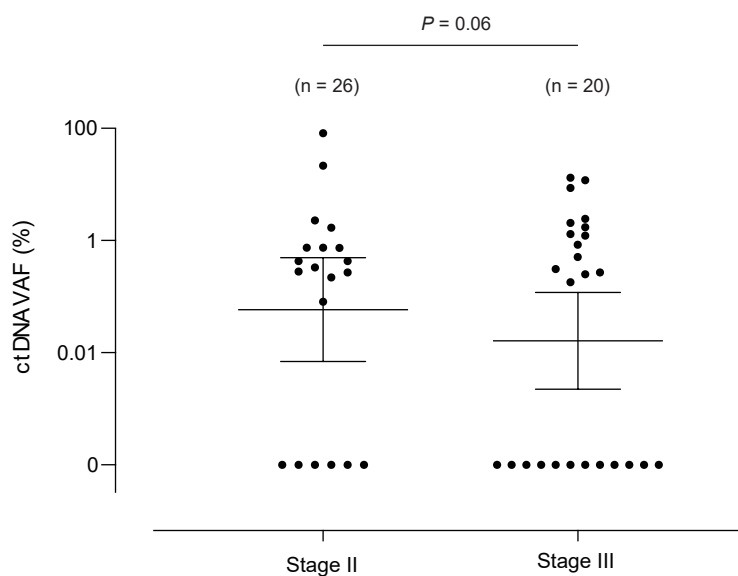

**Supplementary Figure 3. Pretreatment levels of ctDNA in patients with stage II and III CRC.**  
ctDNA, circulating tumor DNA; VAF, variant allele frequency.

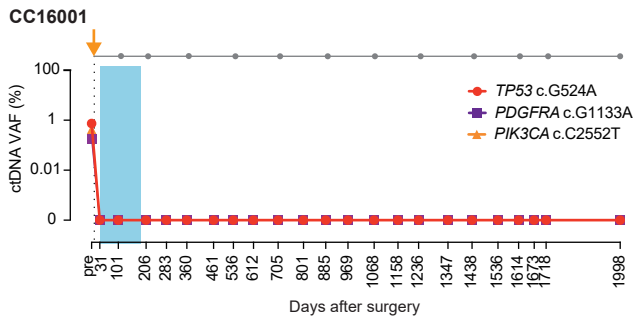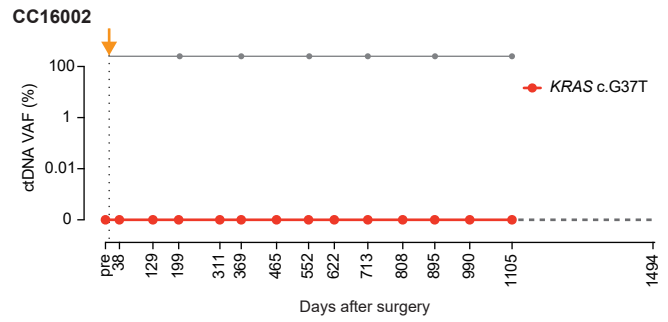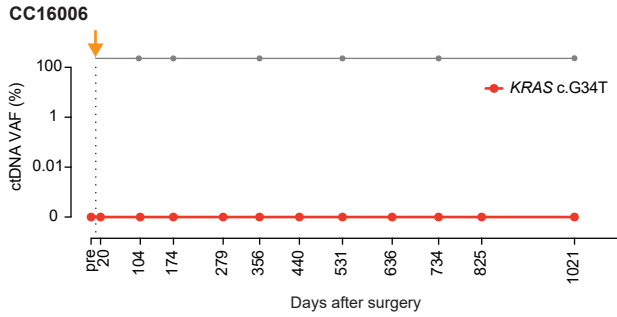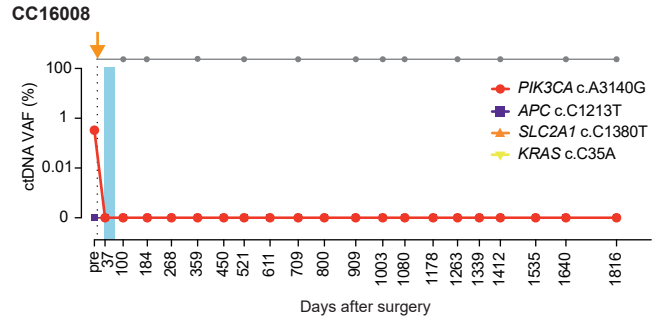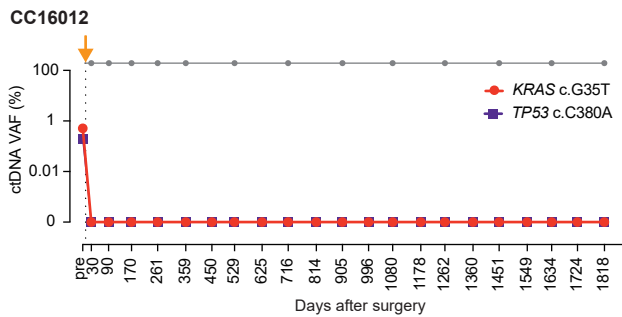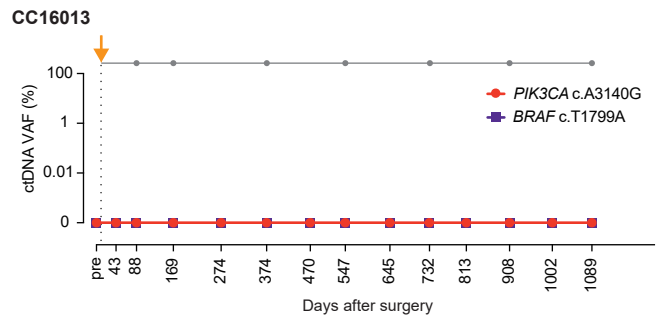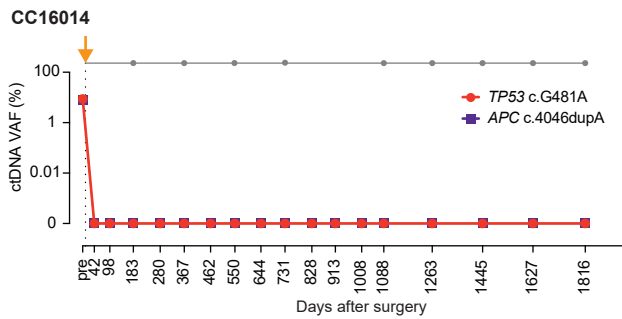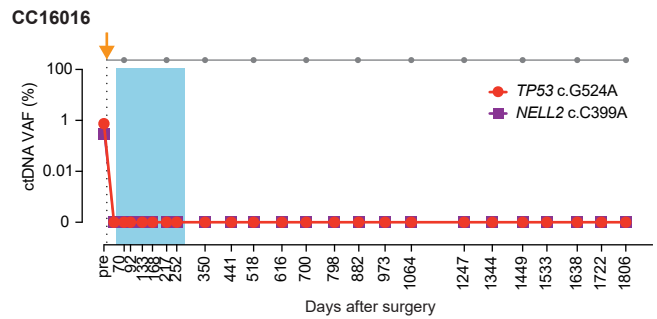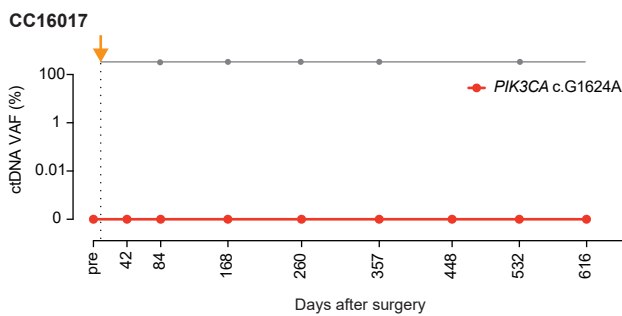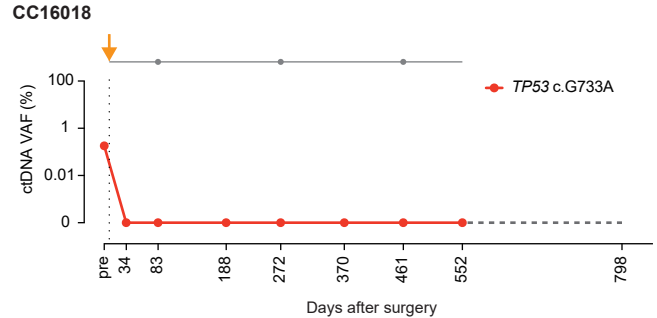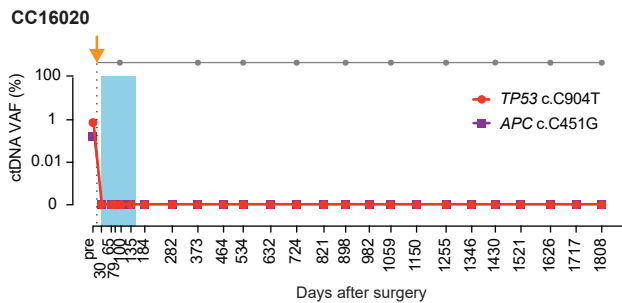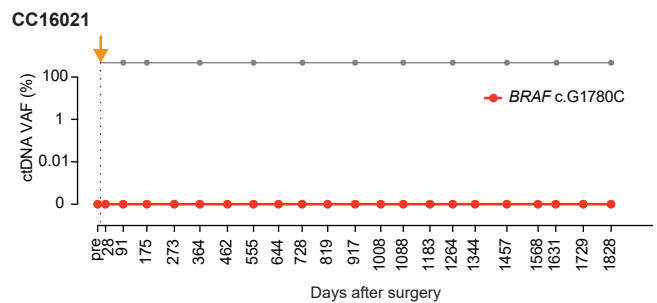

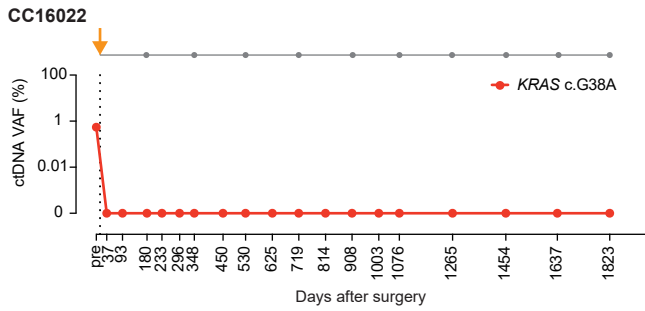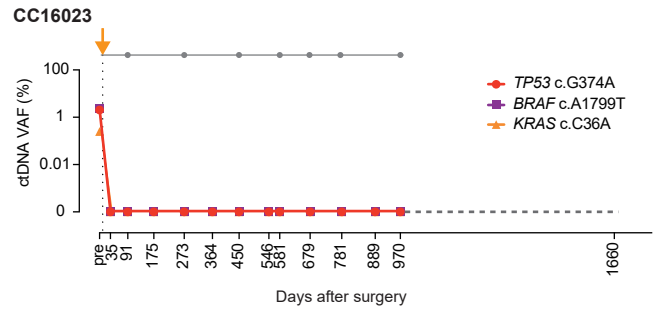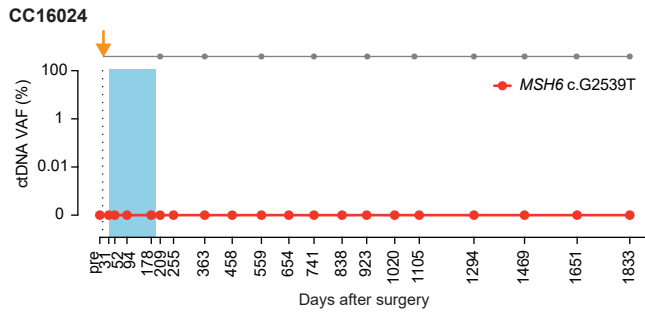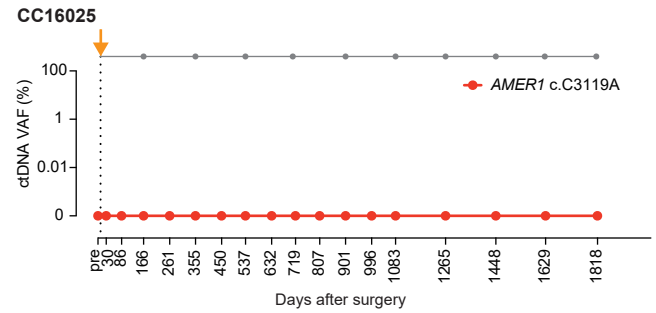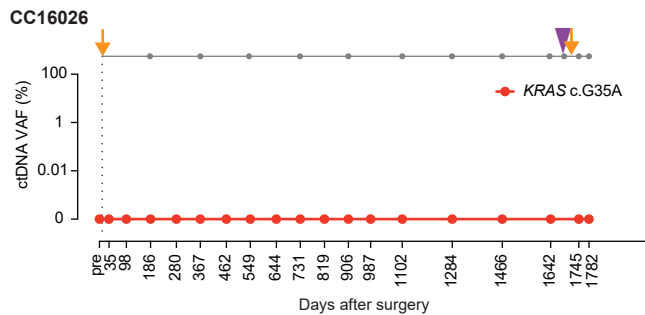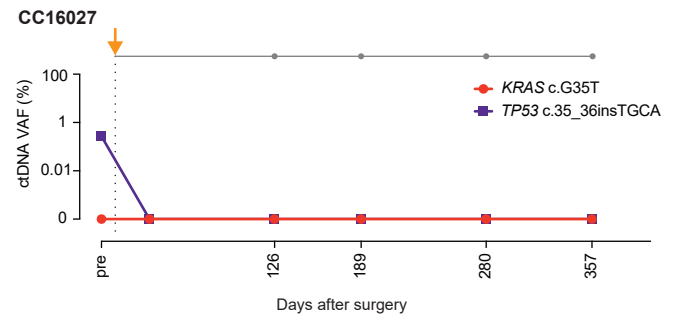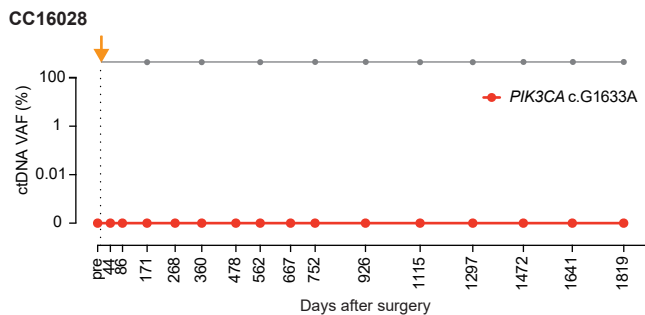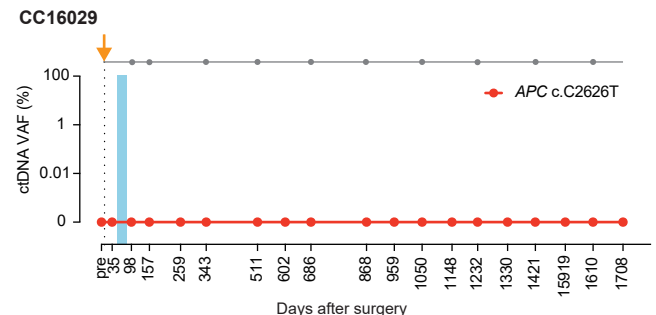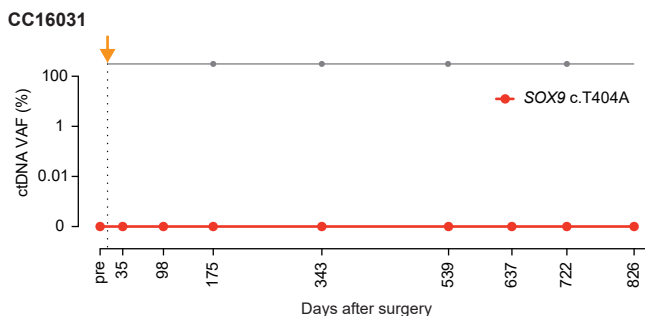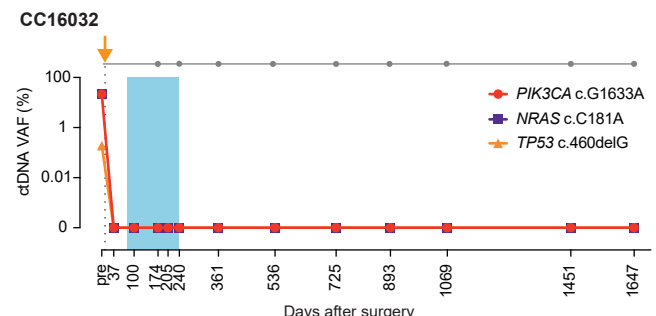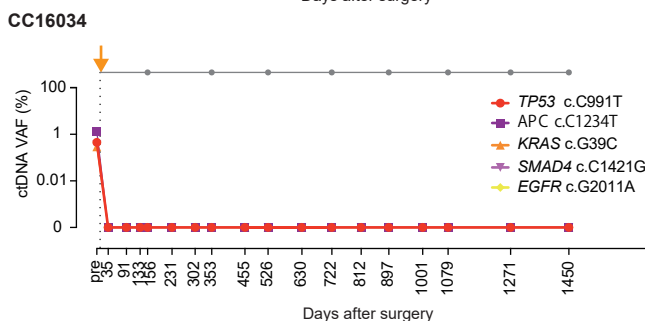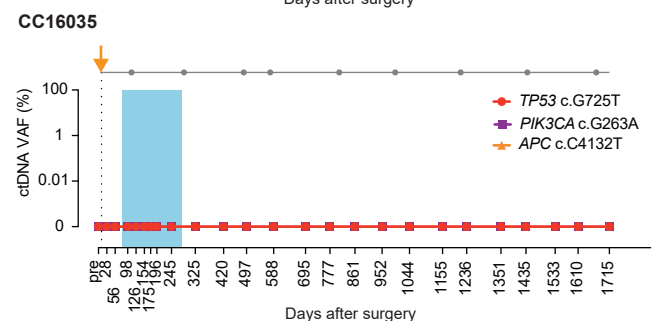

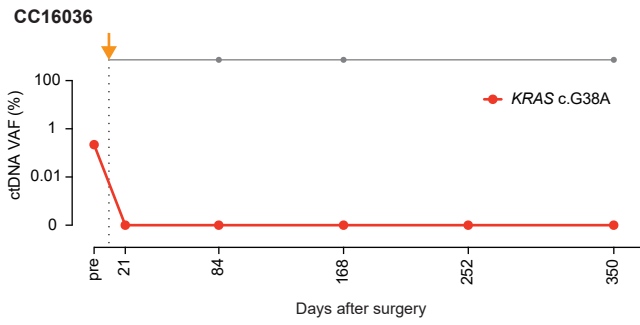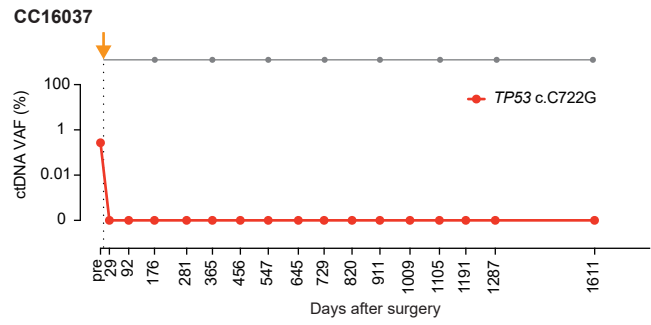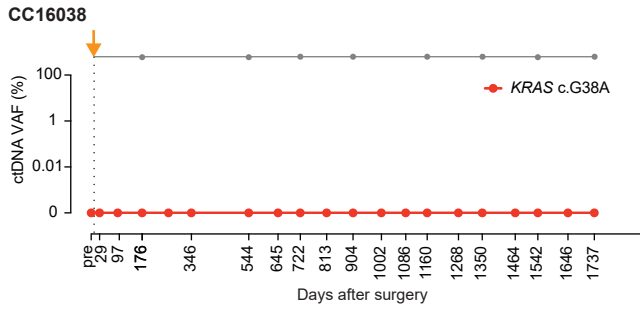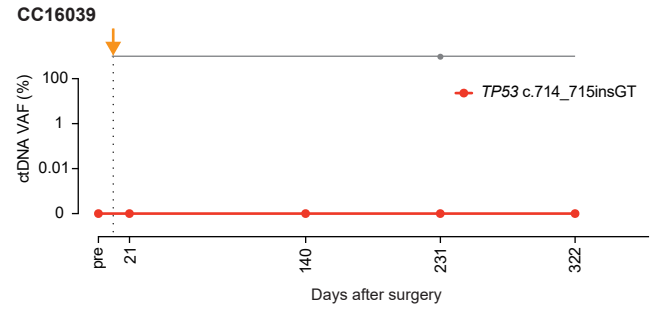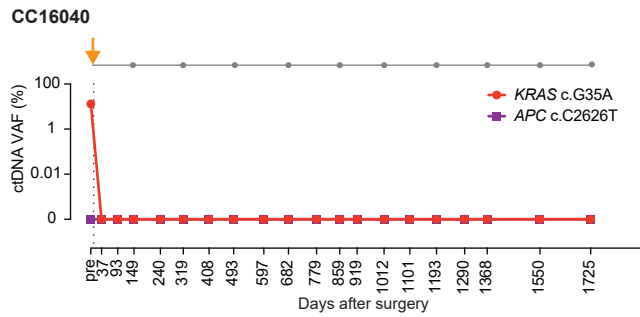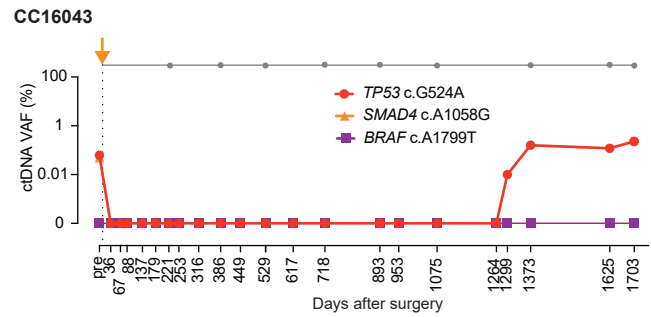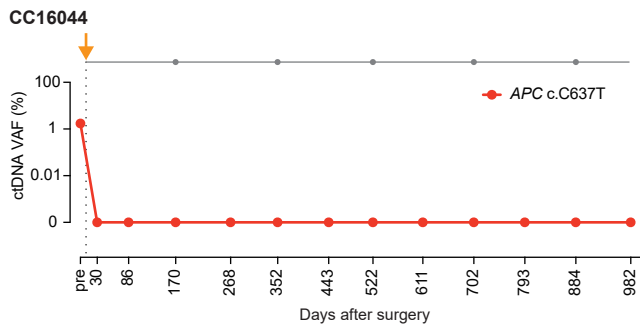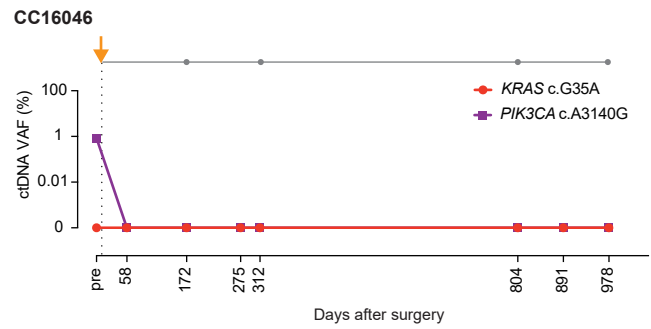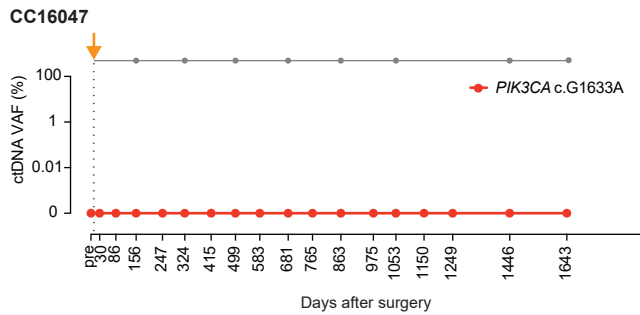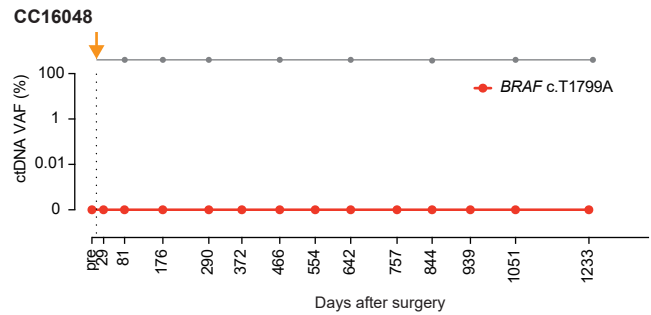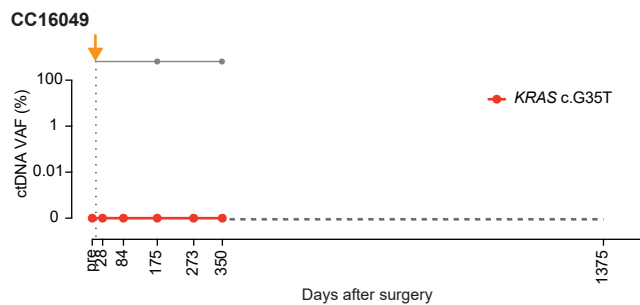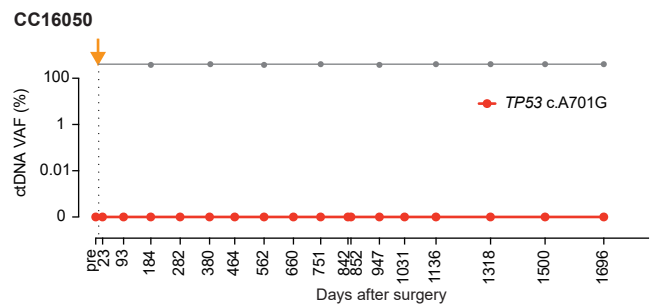



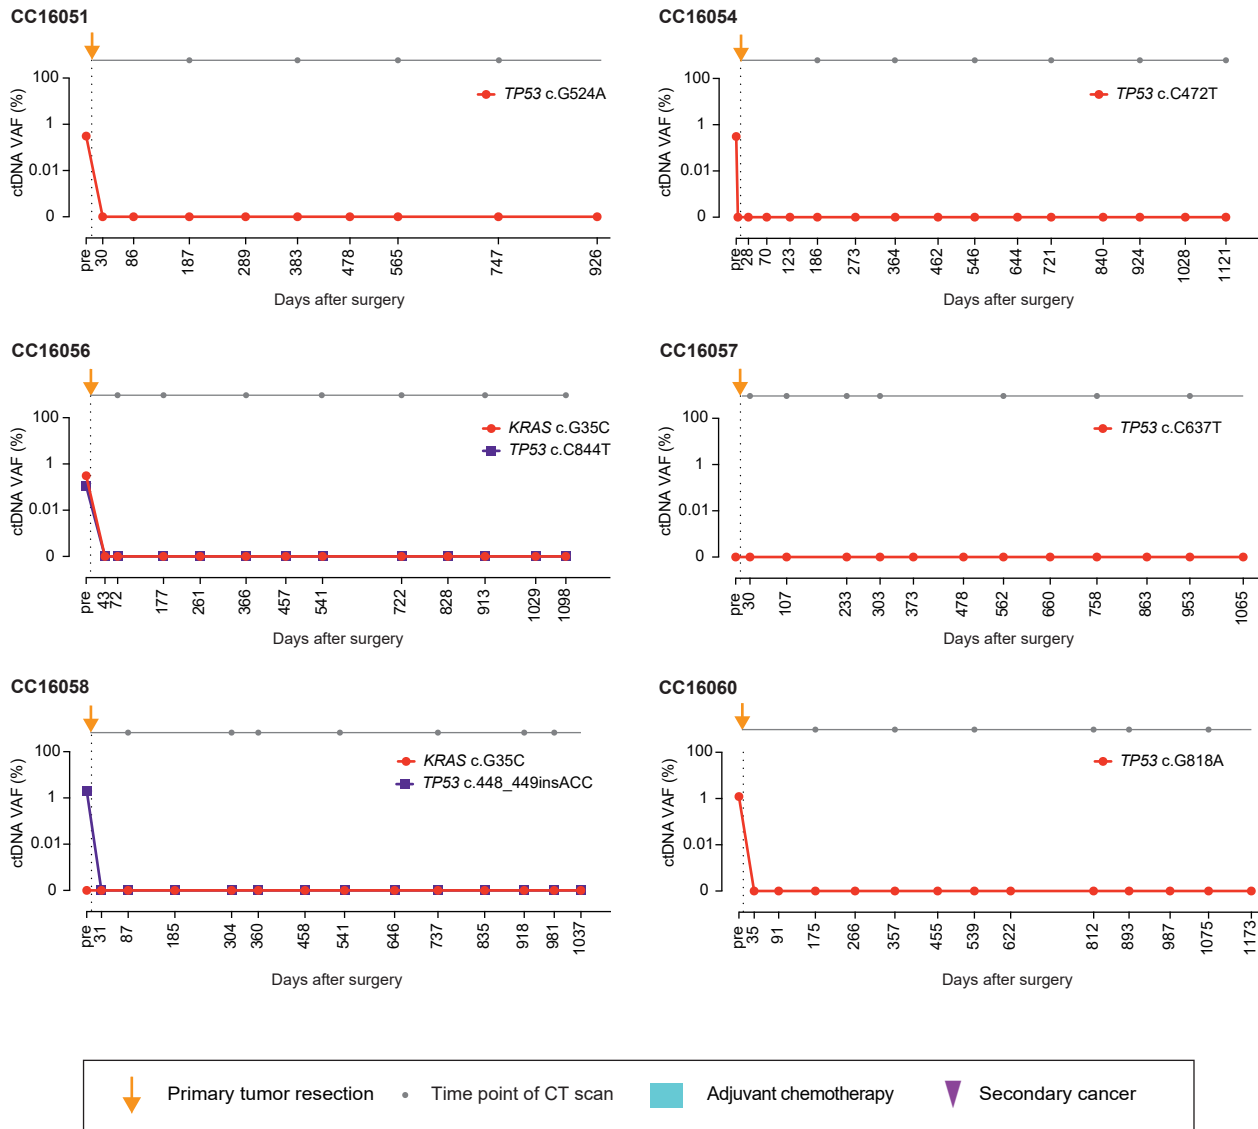

**Supplementary Figure 4. Dynamics of ctDNA in 42 patients with CRC without clinical relapse.**  
 VAF, variant allele frequency.

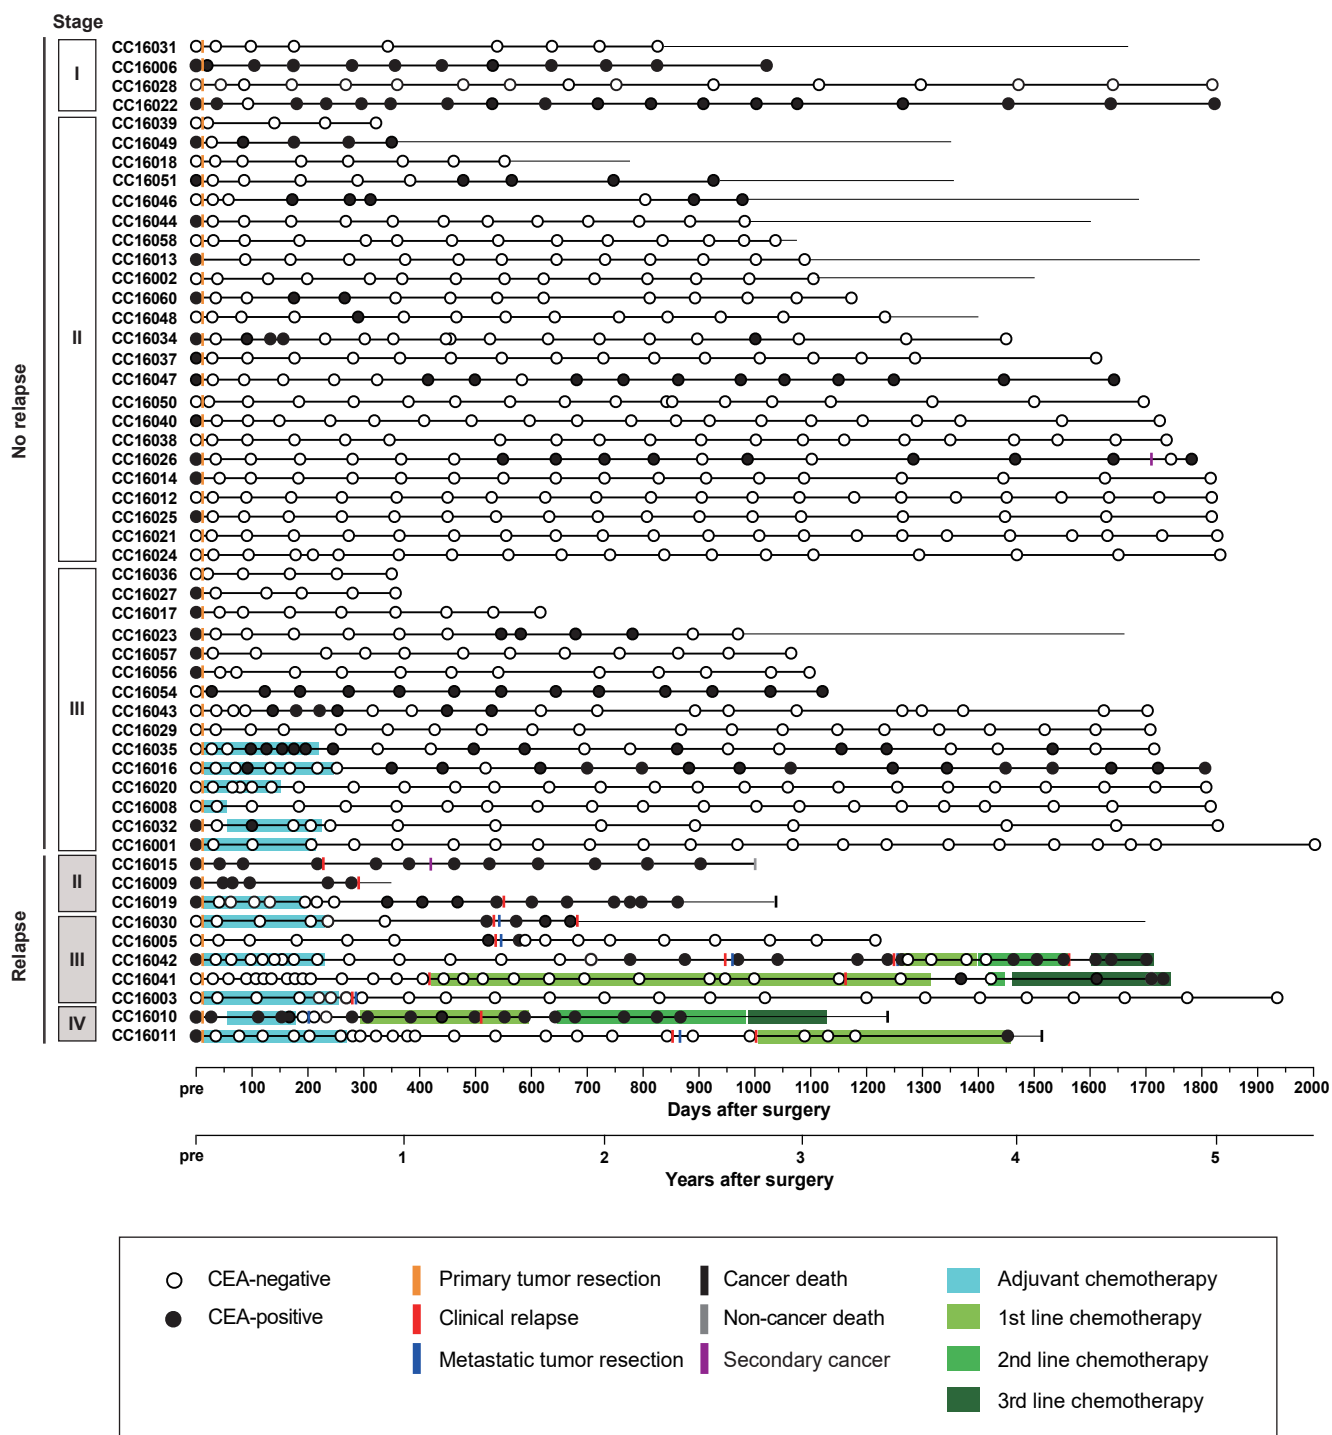

Supplementary Figure 5. Longitudinal CEA monitoring during the postoperative period in patients with CRC. CEA, carcinoembryonic antigen.

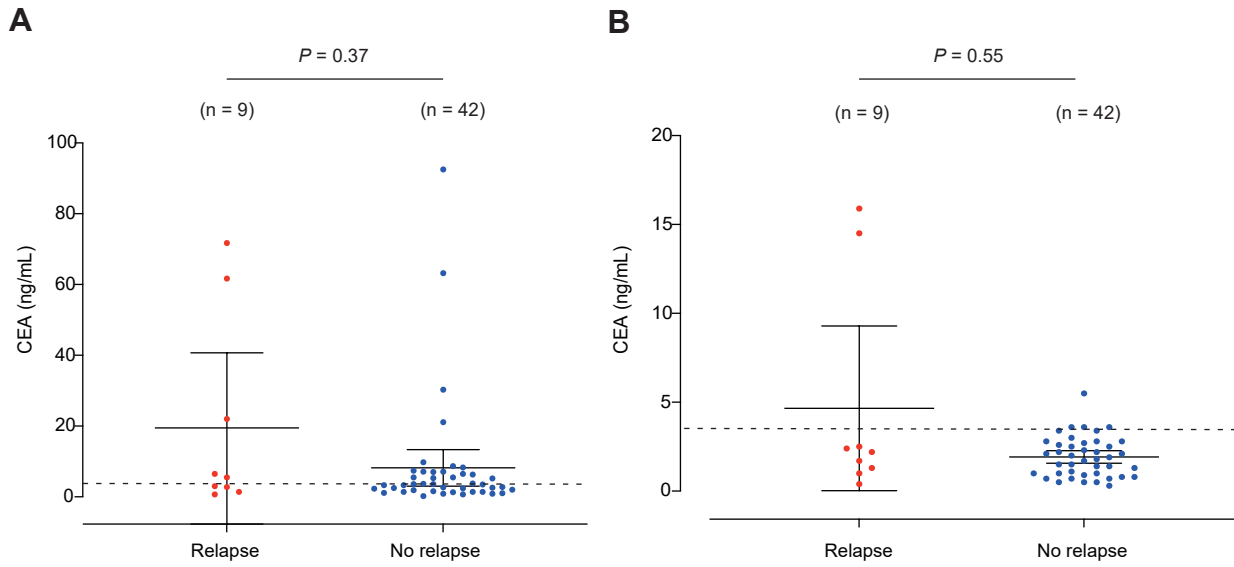

**Supplementary Figure 6. Association between CEA status and clinical relapse.**

(A) Preoperative and (B) postoperative levels of CEA in CRC patients with and without relapse. Plasma samples at the first postoperative time point were collected an average of 34.0 days (range, 20-58) after curative resection. Broken lines indicate the upper limit of normal levels for CEA (3.4 ng/mL). CEA, carcinoembryonic antigen.

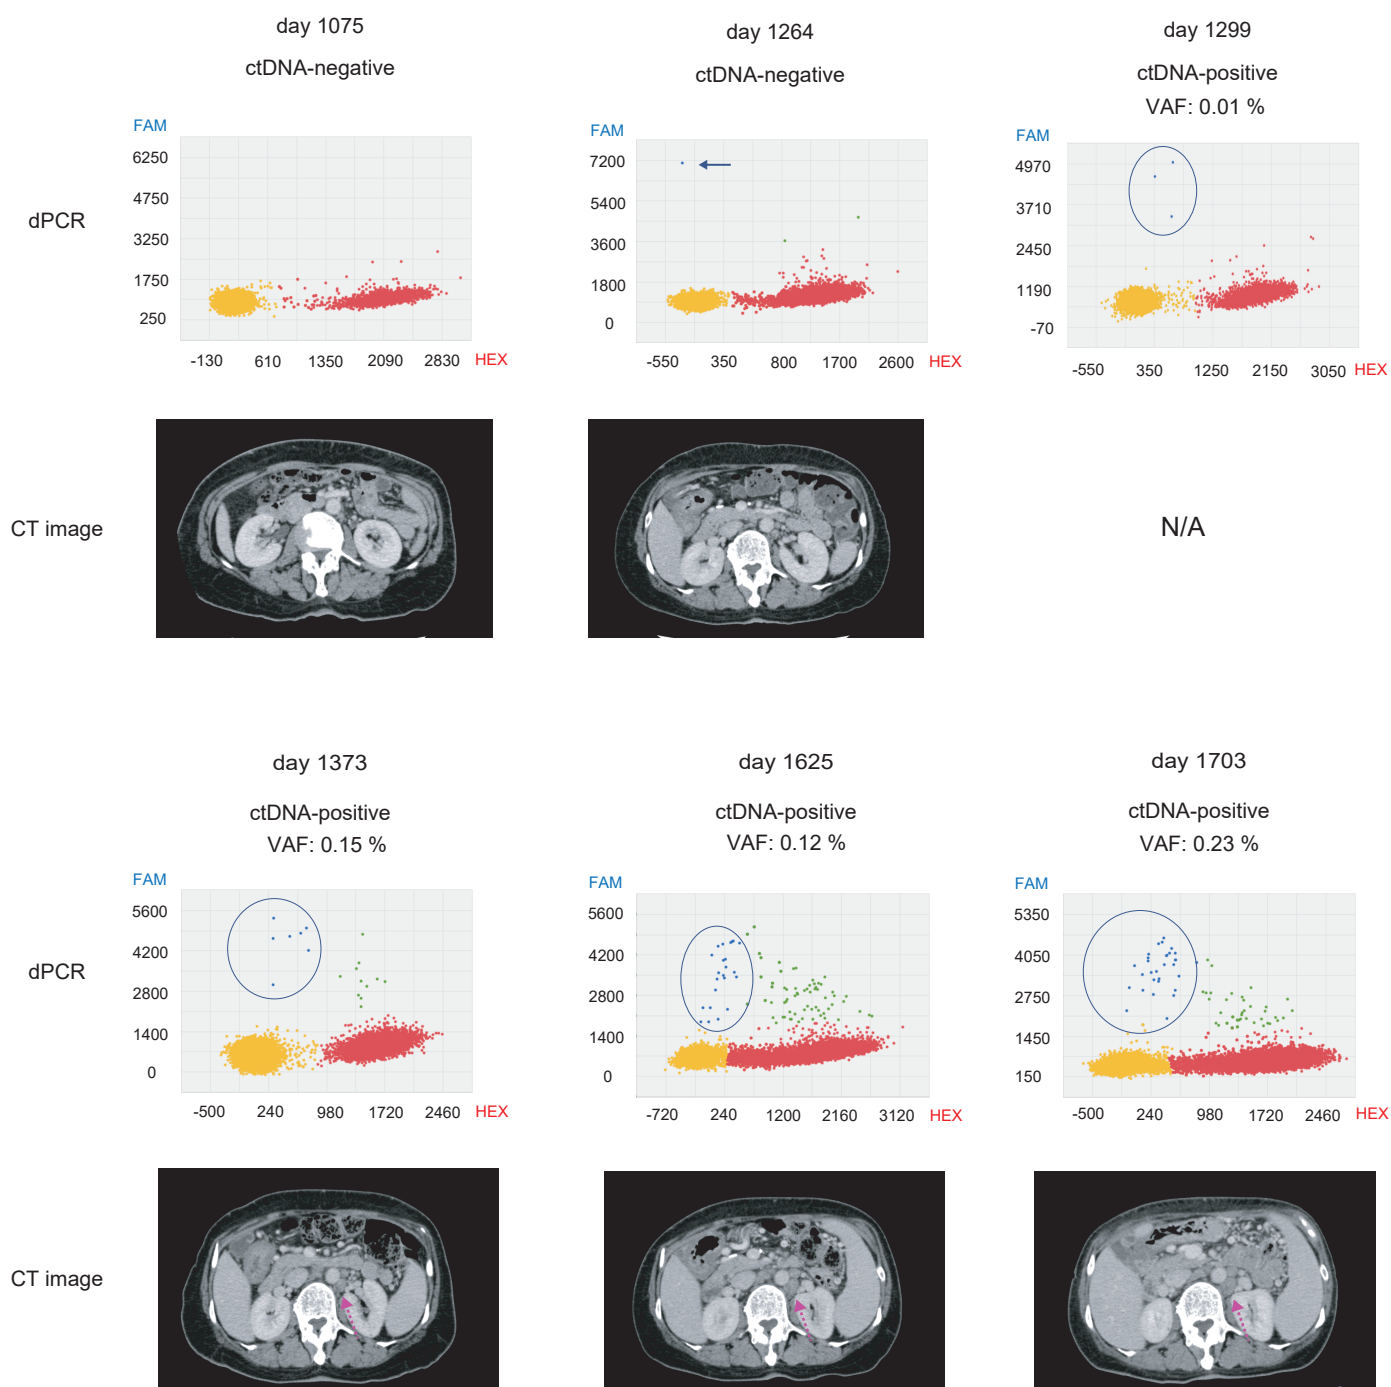

**Supplementary Figure 7. Results of ctDNA analyses and corresponding CT images for Patient CC16043.**

Results of ctDNA analyses by dPCR at postoperative time points are shown in the upper panels. Red and blue dots indicate wild-type and mutant reactions for a specifically designed primer/probe set for the tumor-specific mutation (*TP53* c.G524A). CT images corresponding to the timing of dPCR analysis are shown in the lower panels. Although one positive reaction for a mutation was observed on day 1,264 (arrow), no positive reactions for the mutation were detected upon retesting. Therefore, the ctDNA status of this time point was defined as ctDNA negative (see Supplementary Methods). From days 1,299 to 1,703, ctDNA VAF levels showed an increasing trend (blue circles). Red arrows in the bottom panels of the CT images indicate a non-specific para-aortic lesion, which was not confirmed as relapse. dPCR, digital PCR; ctDNA, circulating tumor DNA; VAF, variant allele frequency; CT, computed tomography; N/A, not applicable.

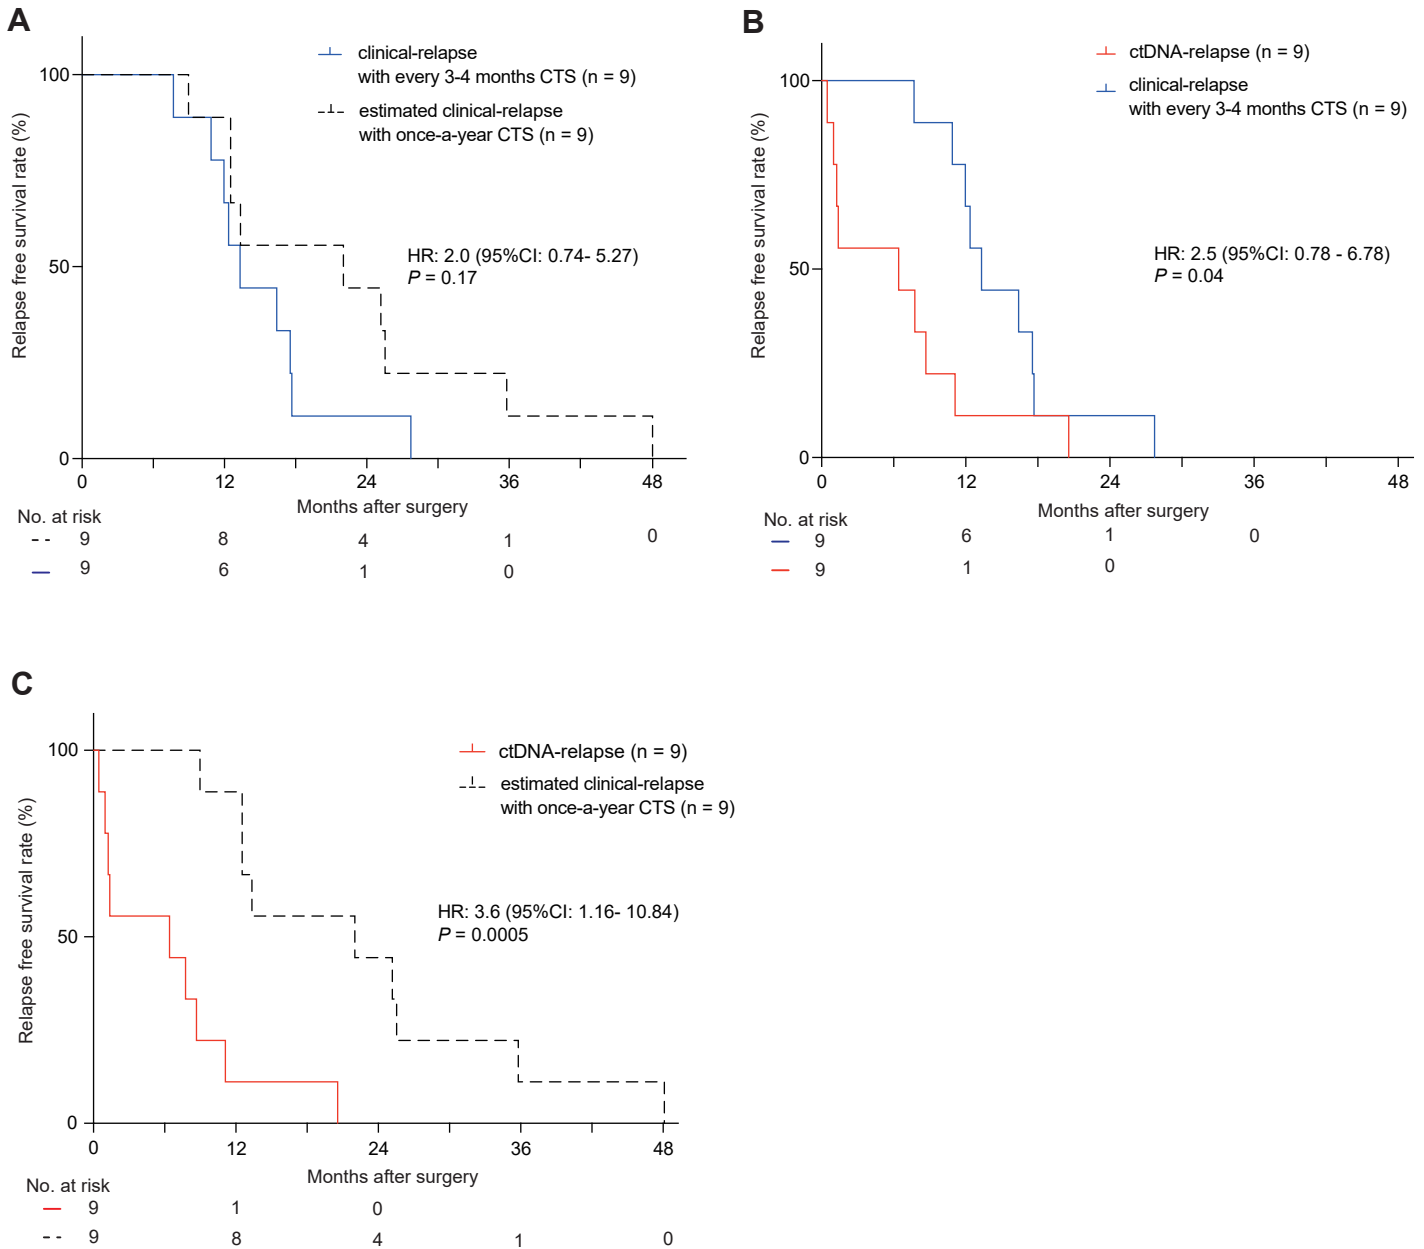

**Supplementary Figure 8. Comparison of relapse free survival (RFS) rates according to relapse type.**

(A) Clinical-RFS rates with CTS every 3-4 months and estimated clinical-RFS with once-a-year CTS. (B) Clinical-RFS and ctDNA-RFS rates. (C) Estimated clinical-RFS with once-a-year CTS and ctDNA-RFS rates. *P* values were derived using the Kaplan-Meier log-rank test. HR was calculated using the log-rank test. HR, ctDNA, circulating tumor DNA; CTS, computed tomography scan; HR, hazard ratio.

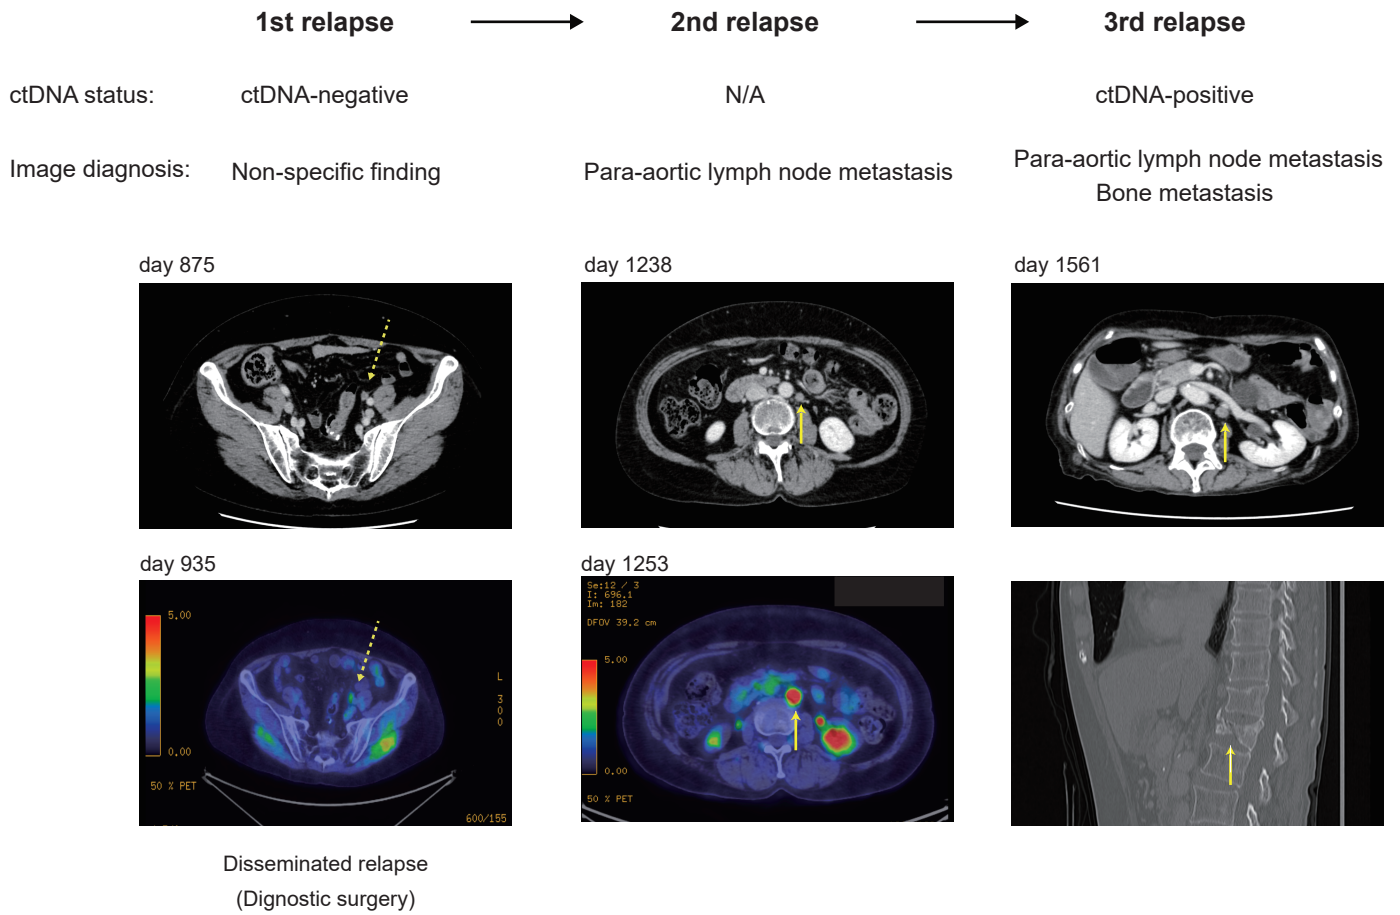

**Supplementary Figure 9. Images of recurrent tumors in Patient CC16042.**

Left panels, Non-specific findings of an intrapelvic small lesion on CTS and PET/CT. The lesion was pathologically diagnosed as a disseminated relapse after diagnostic surgery (first relapse). Middle panels, Para-aortic lymph node metastasis on CTS and PET/CT (second relapse). Right panels, Metastases of para-aortic lymph node and bone (third relapse). After surgical resection of the metastasis at the time of second relapse, continuous ctDNA positivity was observed until the third relapse (see Figure 4). Dashed arrows indicate non-specific imaging findings. Solid arrows indicate imaging-confirmed metastasis. CTS, computed tomography scan; PET, positron emission tomography; ctDNA, circulating tumor DNA.
